# Supplementary material for: Genome of Crucihimalaya himalaica, a close relative of Arabidopsis, shows ecological adaptation to high altitude
Source: PubMed Central journal article supplement — Proc Natl Acad Sci U S A. 2019 Mar 20;116(14):7137–46. doi: 10.1073/pnas.1817580116 (PMC6452661; doi:10.1073/pnas.1817580116), 2019-03-20
Supplement: pnas.1817580116.sapp.pdf [file pnas.1817580116.sapp.pdf]

## Supplementary Information for

### **The genome of *Crucihimalaya himalaica*, a close relative of *Arabidopsis*, shows ecological adaptation to high altitude**

Ticao Zhang<sup>a,b,1</sup>, Qin Qiao<sup>c,1</sup>, Polina Yu. Novikova<sup>d,e,1</sup>, Qia Wang<sup>a</sup>, Jipei Yue<sup>a</sup>, Yanlong Guan<sup>a</sup>, Shengping Ming<sup>f</sup>, Tianmeng Liu<sup>f</sup>, Ji De<sup>f</sup>, Yixuan Liu<sup>f</sup>, Ihsan A. Al-Shehbaz<sup>g</sup>, Hang Sun<sup>a</sup>, Marc Van Montagu<sup>d,e,2</sup>, Jinling Huang<sup>a,h,i,2</sup>, Yves Van de Peer<sup>d,e,j,2</sup>, and La Qiong<sup>f,2</sup>

<sup>a</sup>CAS Key Laboratory for Plant Diversity and Biogeography of East Asia, Kunming Institute of Botany, Chinese Academy of Sciences, Kunming 650201, China; <sup>b</sup>College of Chinese Material Medica, Yunnan University of Chinese Medicine, Kunming 650500, China; <sup>c</sup>School of Agriculture, Yunnan University, Kunming 650091, China; <sup>d</sup>Department of Plant Biotechnology and Bioinformatics, Ghent University, 9052 Ghent, Belgium; <sup>e</sup>Center for Plant Systems Biology, VIB, 9052 Ghent, Belgium; <sup>f</sup>Institute of Biodiversity Science and Geobiology, College of Science, Tibet University, Lhasa, 850012, China; <sup>g</sup>Missouri Botanical Garden, St. Louis, MO 63166-0299, USA; <sup>h</sup>Department of Biology, East Carolina University, Greenville, NC 27858, USA; <sup>i</sup>Institute of Plant Stress Biology, State Key Laboratory of Cotton Biology, School of Life Sciences, Henan University, Kaifeng 475001, China; <sup>j</sup>Department of Biochemistry, Genetics and Microbiology, University of Pretoria, Pretoria 0028, South Africa

Corresponding author: La Qiong

Email: lhagchong@163.com

#### **This PDF file includes:**

Figs. S1 to S5

Tables S1 to S16

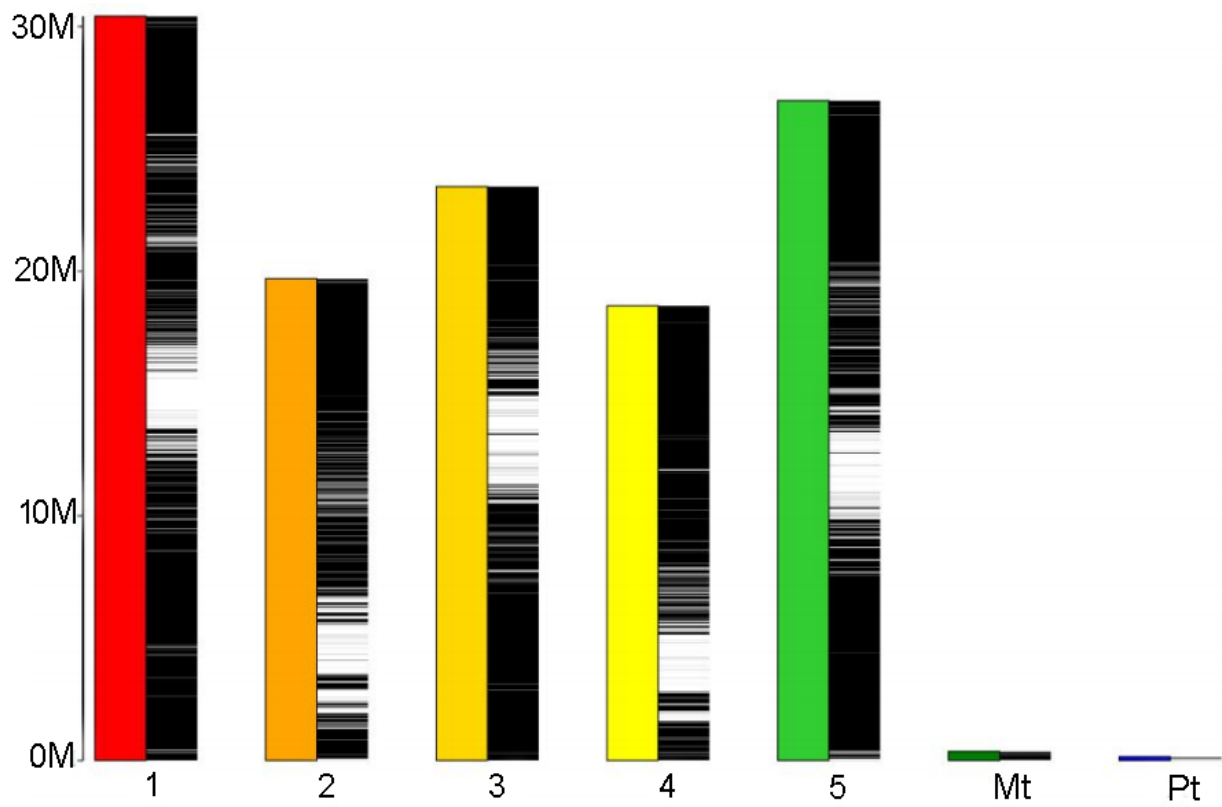

Figure S1. The coverage diagram using raw reads mapped to the chromosomes of *Arabidopsis thaliana* by Lastz software.

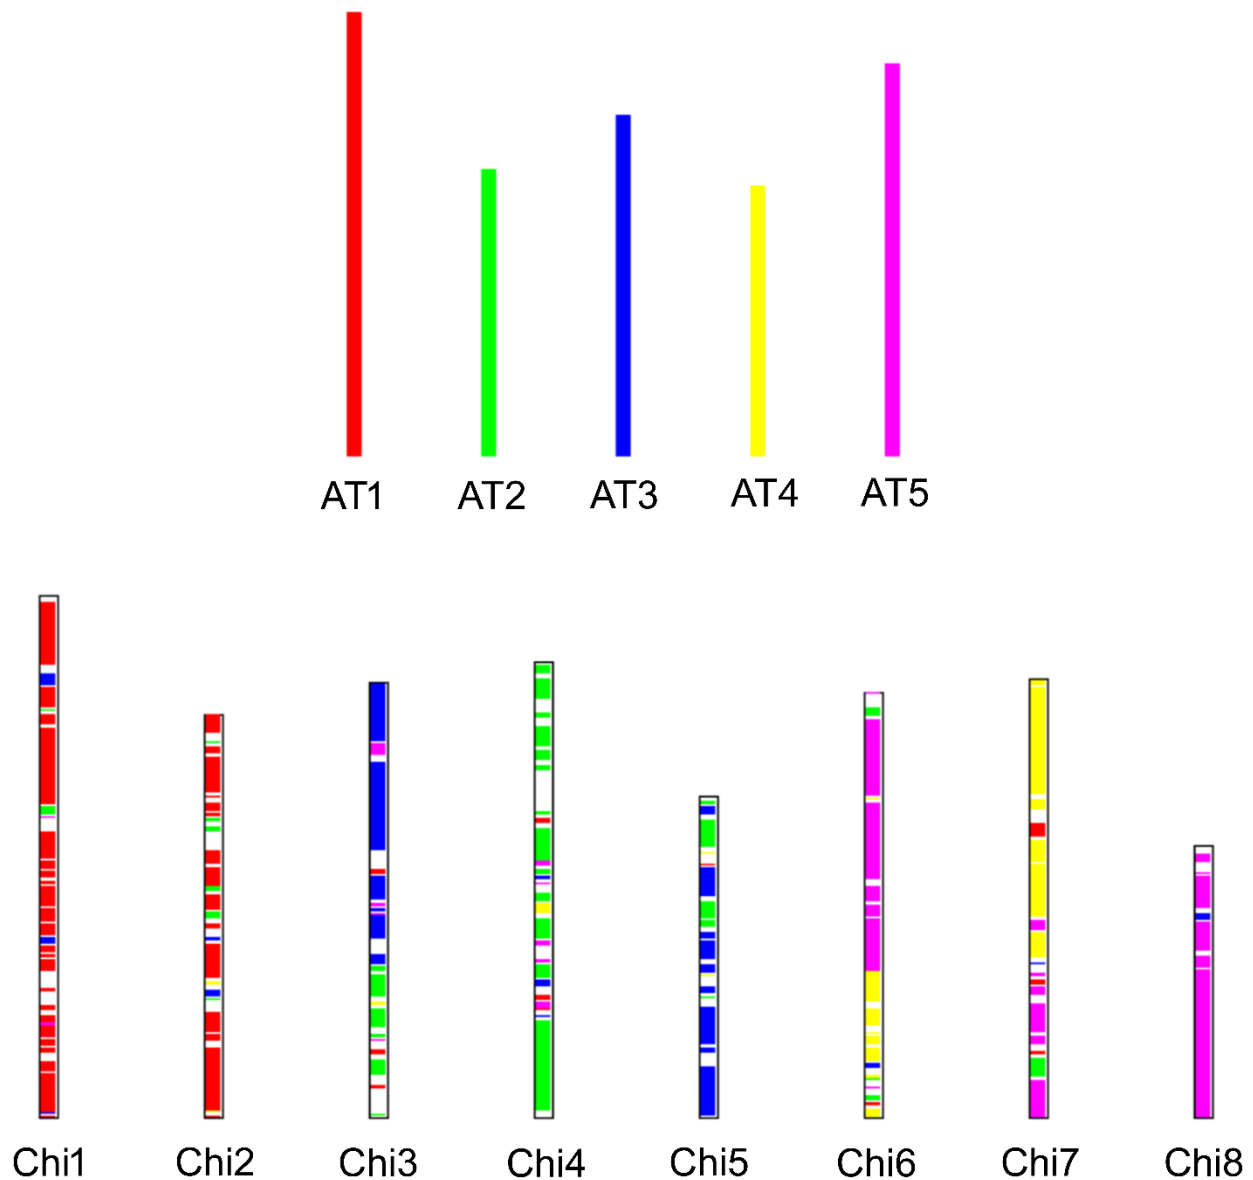

Figure S2. The genomic collinearity analysis between chromosomes of *A. thaliana* (AT) and pseudo-chromosomes of *Crucihimalaya himalaica* (Chi) using MCscanX software. We first identified the orthologs between *C. himalaica* and *A. thaliana*. Then we locate the scaffolds of *C. himalaica* to the ancestral Brassicaceae karyotype chromosomes (1) by corresponding genome blocks which include the same orthologs of *A. thaliana*. We have not used the pseudo-chromosomes of *C. himalaica* for further analyses because there are many genome gaps.

1. Cheng S, et al. (2013) The *Tarenaya hassleriana* genome provides insight into reproductive trait and genome evolution of crucifers. *Plant Cell* 25(8):2813-2830.

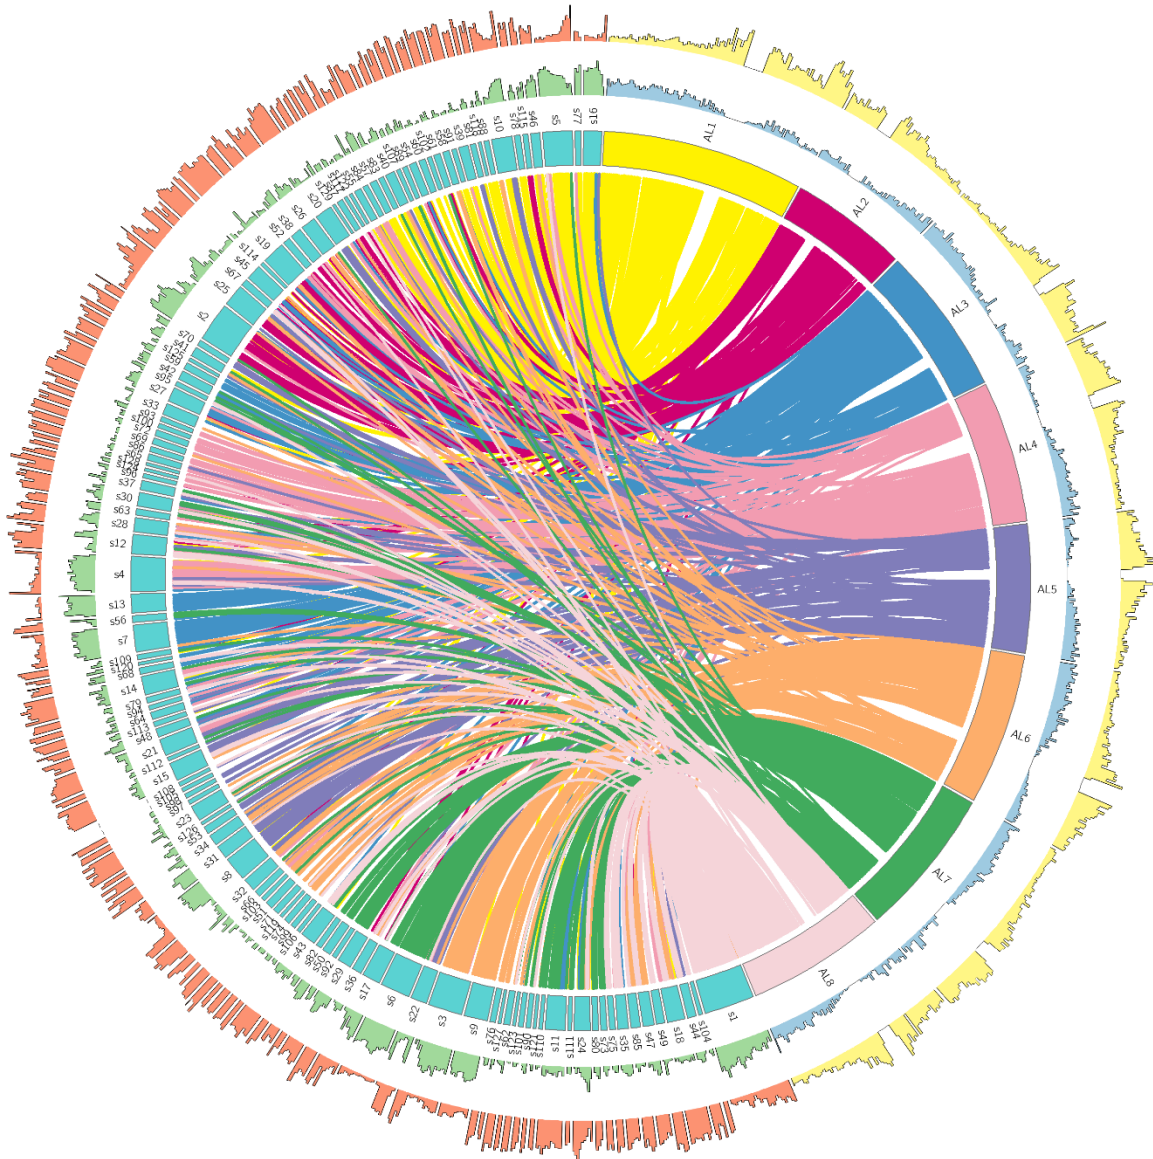

Figure S3. Comparative genomic analyses and Circos plot of *C. himalaica* vs. *A. lyrata* genomic features. Tracks from inside to outside are: collinearity blocks between both genomes, number of chromosomes/scaffolds, gene density, and transposable element density.

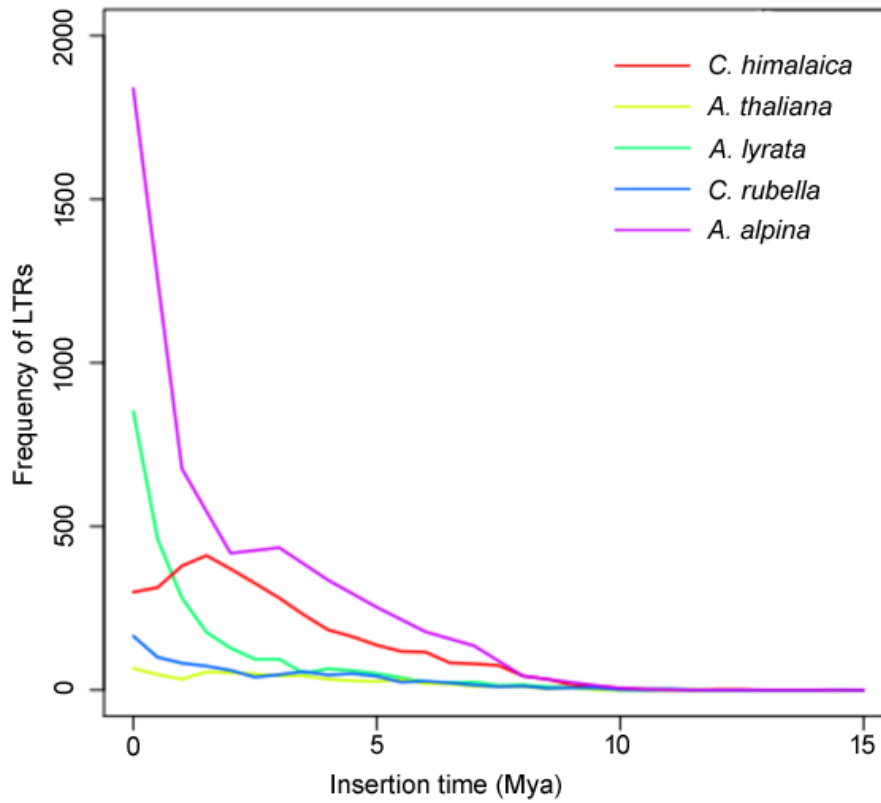

Figure S4. Insertion time distribution of long terminal repeat retrotransposons in five relatives. There is comparably dramatic proliferation of LTR retrotransposons in *A. alpina*. The different pattern of proliferation of LTR retrotransposons between *A. alpina* and *C. himalaica* might reflect different processes of genome adaptive evolution and geological history.

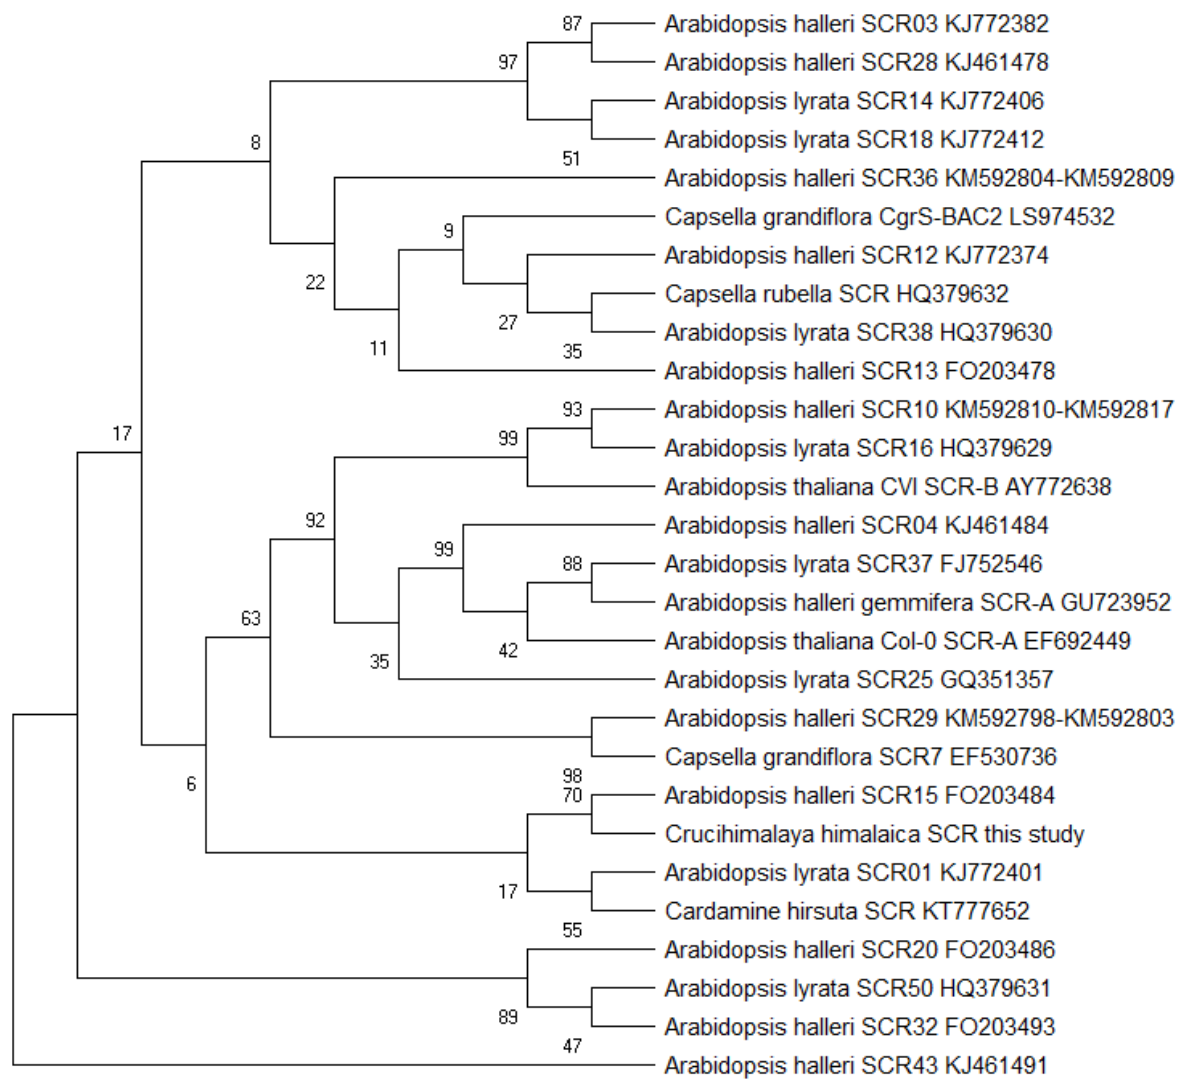

Figure S5. Molecular phylogeny of the SCR sequences from *A. lyrata*, *A. halleri*, *A. thaliana*, *C. hirsuta*, *C. grandiflora*, *C. rubella* and *C. himalaica*. Names of the SCR sequences are followed by the accession numbers. The phylogeny was generated using maximum likelihood algorithm with 500 bootstrap replicates.

**Table S1. Statistics of characteristics of *C. himalaica* genome (*K*-mer=17)**

| Characteristics     |                |
|---------------------|----------------|
| <i>K</i> -mer       | 17             |
| Depth               | 66             |
| N <i>K</i> -mer     | 18,107,540,600 |
| Genome size         | 274.36 Mb      |
| Revised Genome size | 265.23 Mb      |
| Heterozygous rate   | 0.70%          |
| Repeat rate         | 49.82%         |

**Table S2. Sequencing and quality filtering statistics.**

| Pair-end libraries | Insert size | Total data(G) | Sequence coverage (X) |
|--------------------|-------------|---------------|-----------------------|
| Illumina reads     | 250 bp      | 15.22         | 67.45                 |
|                    | 450 bp      | 8.16          | 36.16                 |
|                    | 2 Kbp       | 5.95          | 26.37                 |
|                    | 5 Kbp       | 5.52          | 24.46                 |
|                    | 10 Kbp      | 4.71          | 20.87                 |
|                    | 15 Kbp      | 4.93          | 21.85                 |
| Pacbio reads       | /           | 6.19          | 27.43                 |
| Total              | /           | 50.68         | 224.59                |



**Table S3. Assessment of genome assembly quality by PE reads.**

|        | Type                      | Percentage |
|--------|---------------------------|------------|
| Reads  | Mapping rate (%)          | 96.69%     |
|        | Average sequencing depth  | 79.46%     |
|        | Coverage (%)              | 96.43%     |
| Genome | Coverage (%)              | 95.82%     |
|        | Coverage at least 10X (%) | 95.23%     |
|        | Coverage at least 20X (%) | 94.05%     |

**Table S4. Statistics of predicted protein-coding genes in *C. himalaica* and relatives**

| Species                 | Number | Average<br>gene length<br>(bp) | Average<br>CDS length<br>(bp) | Average<br>exons per<br>gene | Average<br>exon length<br>(bp) | Average<br>intron length<br>(bp) |
|-------------------------|--------|--------------------------------|-------------------------------|------------------------------|--------------------------------|----------------------------------|
| <i>C. himalaica</i>     | 27,019 | 1,969.20                       | 1,145.15                      | 4.98                         | 229.78                         | 206.86                           |
| <i>A. thaliana</i>      | 27,173 | 1,879.97                       | 1,218.93                      | 5.16                         | 236.26                         | 158.93                           |
| <i>A. lyrata</i>        | 32,036 | 1,878.02                       | 1,089.46                      | 4.89                         | 222.60                         | 202.49                           |
| <i>Capsella rubella</i> | 26,634 | 1,941.40                       | 1,238.98                      | 5.16                         | 240.23                         | 168.96                           |

**Table S5. Information of function annotation in *C. himalaica* genes.**

| #Database  |      | Annotated Number | Annotated Percent (%) |
|------------|------|------------------|-----------------------|
| NR         |      | 26,795           | 99.2                  |
| Swiss-Prot |      | 21,163           | 78.3                  |
| KEGG       |      | 19,450           | 72                    |
|            | All  | 22,639           | 83.8                  |
| InterPro   | Pfam | 21,008           | 77.8                  |
|            | GO   | 15,078           | 55.8                  |
| Annotated  |      | 26,806           | 99.2                  |
| Total      |      | 27,019           | -                     |

**Table S6. Statistics of noncoding RNA in *C. himalaica* genome.**

| Type  |          | Copy | Average length (bp) | Total length (bp) | Percent of genome (%) |
|-------|----------|------|---------------------|-------------------|-----------------------|
| miRNA |          | 448  | 118.647321          | 53,154            | 0.022645              |
| tRNA  |          | 577  | 74.8544194          | 43,191            | 0.018401              |
| rRNA  | rRNA     | 153  | 126.052288          | 19,286            | 0.008217              |
|       | 18S      | 9    | 350.666667          | 3,156             | 0.001345              |
|       | 28S      | 12   | 133.166667          | 1,598             | 0.000681              |
|       | 5.8S     | 1    | 167                 | 167               | 0.000071              |
|       | 5S       | 131  | 109.656489          | 14,365            | 0.00612               |
| snRNA | snRNA    | 974  | 109.306982          | 106,465           | 0.045358              |
|       | CD-box   | 824  | 104.850728          | 86,397            | 0.036808              |
|       | HACA-box | 51   | 127.960784          | 6,526             | 0.00278               |
|       | splicing | 99   | 136.787879          | 13,542            | 0.005769              |

**Table S7. Assessment of the *C. himalaica* genome assembly using transcriptome sequences from reads of different tissues assembled by trinity software.**

| Data   | Number | Total length (bp) | Sequences covered by assembly (%) | With >90% sequence in one scaffold | Number Percent (%) | With >50% sequence in one scaffold | Number Percent (%) |
|--------|--------|-------------------|-----------------------------------|------------------------------------|--------------------|------------------------------------|--------------------|
| >0bp   | 29,420 | 27,458,144        | 99.74                             | 27,174                             | 92.37              | 29,102                             | 98.92              |
| >200bp | 29,420 | 27,458,144        | 99.74                             | 27,174                             | 92.37              | 29,102                             | 98.92              |
| >500bp | 15,754 | 23,039,370        | 99.87                             | 14,804                             | 93.97              | 15,629                             | 99.21              |
| >1k    | 9,156  | 18,350,856        | 99.92                             | 8,679                              | 94.79              | 9,096                              | 99.35              |
| >2k    | 3,354  | 9,994,990         | 99.94                             | 3,166                              | 94.4               | 3,331                              | 99.31              |

**Table S8. Scaffolds from the *C. himalaica* assembly were aligned to conserved genes using BUSCO method.**

| Species             | Genome Size | BUSCO annotation assessment results  |
|---------------------|-------------|--------------------------------------|
| <i>C. himalaica</i> | 234.72 Mbp  | C:96% [D:16%], F:1.4%, M:2.1%, n:956 |

C: Complete Single-Copy BUSCOs

D: Complete Duplicated BUSCOs

F: Fragmented BUSCOs

M: Missing BUSCOs

n: Total BUSCO groups searched

**Table S9. Statistics of transcription factors (TFs) and transcription regulators (TRs) in *C. himalaica* genome.**

| TFs          | <i>C. himalaica</i> | <i>C. rubella</i> | <i>A. thaliana</i> | <i>A. lyrata</i> |
|--------------|---------------------|-------------------|--------------------|------------------|
| Alfin-like   | 7                   | 7                 | 7                  | 7                |
| AP2/ERF-AP2  | 12                  | 14                | 14                 | 13               |
| AP2/ERF-ERF  | 112                 | 129               | 128                | 128              |
| AP2/ERF-RAV  | 4                   | 3                 | 4                  | 5                |
| B3           | 62                  | 67                | 66                 | 80               |
| B3-ARF       | 15                  | 19                | 22                 | 20               |
| BBR-BPC      | 7                   | 6                 | 7                  | 8                |
| BES1         | 9                   | 9                 | 8                  | 9                |
| bHLH         | 137                 | 131               | 137                | 139              |
| BSD          | 2                   | 1                 | 2                  | 1                |
| bZIP         | 68                  | 69                | 72                 | 78               |
| C2C2-CO-like | 15                  | 16                | 16                 | 17               |
| C2C2-Dof     | 34                  | 35                | 36                 | 34               |
| C2C2-GATA    | 33                  | 30                | 30                 | 28               |
| C2C2-LSD     | 3                   | 3                 | 3                  | 3                |
| C2C2-YABBY   | 7                   | 6                 | 6                  | 6                |
| C2H2         | 114                 | 105               | 105                | 116              |
| C3H          | 54                  | 53                | 57                 | 60               |
| CAMTA        | 6                   | 6                 | 6                  | 6                |
| CPP          | 8                   | 8                 | 8                  | 7                |
| CSD          | 4                   | 2                 | 4                  | 17               |
| DBB          | 4                   | 3                 | 6                  | 4                |
| DBP          | 2                   | 2                 | 2                  | 2                |
| DDT          | 5                   | 6                 | 5                  | 5                |
| E2F-DP       | 8                   | 8                 | 8                  | 7                |
| EIL          | 7                   | 6                 | 6                  | 6                |
| FAR1         | 13                  | 20                | 17                 | 5                |
| GARP-ARR-B   | 8                   | 10                | 10                 | 10               |
| GARP-G2-like | 47                  | 44                | 41                 | 46               |
| GeBP         | 15                  | 17                | 20                 | 21               |
| GRAS         | 39                  | 35                | 34                 | 37               |
| GRF          | 9                   | 8                 | 9                  | 9                |
| HB-BELL      | 12                  | 13                | 13                 | 13               |
| HB-HD-ZIP    | 43                  | 45                | 42                 | 29               |
| HB-KNOX      | 7                   | 7                 | 8                  | 8                |
| HB-other     | 12                  | 11                | 11                 | 12               |

|             |      |      |      |      |
|-------------|------|------|------|------|
| HB-PHD      | 2    | 2    | 2    | 2    |
| HB-WOX      | 16   | 15   | 16   | 16   |
| HRT         | 2    | 2    | 2    | 2    |
| HSF         | 27   | 30   | 24   | 38   |
| LFY         | 1    | 46   | 43   | 47   |
| LIM         | 6    | 1    | 1    | 1    |
| LOB         | 44   | 6    | 6    | 6    |
| MADS-MIKC   | 30   | 35   | 39   | 34   |
| MADS-M-type | 51   | 90   | 69   | 47   |
| MYB         | 136  | 151  | 142  | 148  |
| MYB-related | 75   | 58   | 63   | 61   |
| NAC         | 94   | 110  | 112  | 119  |
| NF-X1       | 2    | 2    | 2    | 3    |
| NF-YA       | 9    | 9    | 10   | 12   |
| NF-YB       | 14   | 12   | 13   | 16   |
| NF-YC       | 14   | 12   | 14   | 15   |
| NOZZLE      | 1    | 1    | 1    | 1    |
| OFP         | 19   | 18   | 17   | 22   |
| PLATZ       | 11   | 12   | 12   | 13   |
| RWP-RK      | 16   | 15   | 14   | 16   |
| S1Fa-like   | 2    | 3    | 3    | 3    |
| SAP         | 1    | 1    | 1    | 1    |
| SBP         | 16   | 15   | 17   | 15   |
| SRS         | 11   | 10   | 10   | 10   |
| STAT        | 2    | 2    | 2    | 3    |
| TCP         | 24   | 25   | 24   | 25   |
| Tify        | 13   | 14   | 16   | 16   |
| Trihelix    | 26   | 26   | 26   | 27   |
| TUB         | 10   | 11   | 11   | 11   |
| ULT         | 2    | 2    | 2    | 2    |
| VOZ         | 2    | 2    | 2    | 3    |
| Whirly      | 3    | 3    | 3    | 4    |
| WRKY        | 68   | 74   | 73   | 80   |
| zf-HD       | 17   | 17   | 17   | 17   |
| Total       | 1711 | 1786 | 1779 | 1832 |

---

| TRs             | <i>C. himalaica</i> | <i>C. rubella</i> | <i>A. thaliana</i> | <i>A. lyrata</i> |
|-----------------|---------------------|-------------------|--------------------|------------------|
| ARID            | 12                  | 15                | 10                 | 8                |
| AUX/IAA         | 30                  | 29                | 29                 | 35               |
| Coactivator p15 | 2                   | 3                 | 3                  | 3                |
| GNAT            | 32                  | 35                | 33                 | 36               |

---



|                |     |     |     |     |
|----------------|-----|-----|-----|-----|
| HMG            | 9   | 10  | 11  | 12  |
| IWS1           | 11  | 8   | 9   | 9   |
| Jumonji        | 18  | 19  | 16  | 19  |
| LUG            | 2   | 2   | 2   | 2   |
| MBF1           | 3   | 3   | 3   | 3   |
| MED6           | 1   | 1   | 1   | 1   |
| MED7           | 2   | 2   | 2   | 3   |
| mTERF          | 33  | 36  | 35  | 46  |
| Others         | 77  | 76  | 89  | 86  |
| PHD            | 34  | 32  | 34  | 39  |
| Pseudo ARR-B   | 4   | 5   | 5   | 5   |
| RB             | 1   | 1   | 1   | 1   |
| Rcd1-like      | 4   | 5   | 4   | 4   |
| SET            | 40  | 41  | 43  | 42  |
| SNF2           | 37  | 38  | 39  | 39  |
| SOH1           | 1   | 1   | 1   | 1   |
| SWI/SNF-BAF60b | 19  | 16  | 18  | 19  |
| SWI/SNF-SWI3   | 4   | 4   | 4   | 4   |
| TAZ            | 10  | 10  | 10  | 10  |
| TRAF           | 27  | 26  | 26  | 29  |
| Total          | 413 | 418 | 428 | 456 |

---

**TableS10. Statistics of repeat sequences (above) and transposable elements (TEs, below) in *C. himalaica* genome.**

| Type         | Repeat size | Percent of genome (%) |  |
|--------------|-------------|-----------------------|--|
| Trf          | 7,839,117   | 3.339737              |  |
| Repeatmasker | 98,349,552  | 41.900333             |  |
| Proteinmask  | 49,048,563  | 20.896395             |  |
| Total        | 110,107,416 | 46.909592             |  |

  

| Type          | Repeatmasker (rebase+ <i>de novo</i> ) |                       | Repeatmasker ( <i>de novo</i> only) |                       | Combined TEs (without Trf) |                       |
|---------------|----------------------------------------|-----------------------|-------------------------------------|-----------------------|----------------------------|-----------------------|
|               | Length (bp)                            | Percent of genome (%) | Length (bp)                         | Percent of genome (%) | Length (bp)                | Percent of genome (%) |
| DNA           | 21,439,954                             | 9.134167              | 10,403,085                          | 4.432076              | 25,451,841                 | 10.84337              |
| LINE          | 3,019,542                              | 1.28643               | 6,676,747                           | 2.844527              | 7,645,679                  | 3.257325              |
| SINE          | 107,893                                | 0.045966              | 0                                   | 0                     | 107,893                    | 0.045966              |
| LTR           | 68,720,558                             | 29.27735              | 32,053,891                          | 13.656073             | 71,284,904                 | 30.369851             |
| Simple repeat | 427,789                                | 0.182253              | 0                                   | 0                     | 427,789                    | 0.182253              |
| Unknown       | 6,294,682                              | 2.681754              | 0                                   | 0                     | 6,294,682                  | 2.681754              |
| Total         | 98,349,552                             | 41.900333             | 49,048,563                          | 20.896395             | 107,449,857                | 45.77738              |

**Table S11. De novo identification of LTR retrotransposons in multiple species**

| Species            | <i>A. lyrata</i> | <i>A. thaliana</i> | <i>C. himalaica</i> | <i>C. rubella</i> |
|--------------------|------------------|--------------------|---------------------|-------------------|
| Family Number      | 696              | 258                | 1,038               | 390               |
| LTR Number         | 2,523            | 593                | 3,752               | 922               |
| Average LTR Number | 3.625            | 2.298              | 3.615               | 2.364             |
| Max Family         | 143              | 31                 | 190                 | 98                |
| Min Family         | 1                | 1                  | 1                   | 1                 |
| Top10              | 687              | 188                | 739                 | 281               |
| Top20              | 969              | 253                | 1,023               | 360               |
| Top30              | 1,143            | 293                | 1,228               | 415               |
| Top40              | 1,250            | 323                | 1,389               | 457               |
| Top50              | 1,332            | 346                | 1,516               | 490               |
| Top100             | 1,594            | 435                | 1,962               | 603               |

**Table S12. Summary of gene ortholog analysis conducted on nine sequenced genomes.**

| Species               | Name                          | Gene   |
|-----------------------|-------------------------------|--------|
| <i>A. thaliana</i>    | <i>Arabidopsis thaliana</i>   | 26,867 |
| <i>A. lyrata</i>      | <i>Arabidopsis lyrata</i>     | 31,988 |
| <i>C. rubella</i>     | <i>Capsella rubella</i>       | 26,521 |
| <i>E. salsugineum</i> | <i>Eutrema salsugineum</i>    | 26,351 |
| <i>B. rapa</i>        | <i>Brassica rapa</i>          | 41,173 |
| <i>C. hirsuta</i>     | <i>Cardamine hirsuta</i>      | 29,453 |
| <i>S. parvula</i>     | <i>Schrenkiella parvula</i>   | 26,706 |
| <i>A. arabicum</i>    | <i>Aethionema arabicum</i>    | 23,167 |
| <i>C. himalaya</i>    | <i>Crucihimalaya himalaya</i> | 27,019 |

**Table S13. Summary of significantly expanded and contracted orthogroups in five closely related species.**

| Expansive 150 orthogroups | <i>A. thaliana</i> | <i>A. lyrata</i> | <i>Capsella rubella</i> | <i>C. himalaica</i> | <i>Cardamine hirsuta</i> | P value  |
|---------------------------|--------------------|------------------|-------------------------|---------------------|--------------------------|----------|
| my_prefix71               | 1                  | 0                | 0                       | 48                  | 0                        | 1.76E-54 |
| my_prefix128              | 1                  | 0                | 0                       | 35                  | 0                        | 6.76E-41 |
| my_prefix165              | 0                  | 0                | 0                       | 31                  | 0                        | 6.14E-36 |
| my_prefix177              | 0                  | 0                | 0                       | 30                  | 0                        | 1.06E-34 |
| my_prefix179              | 0                  | 0                | 0                       | 30                  | 0                        | 1.06E-34 |
| my_prefix178              | 1                  | 1                | 0                       | 27                  | 1                        | 5.47E-31 |
| my_prefix215              | 0                  | 0                | 0                       | 27                  | 0                        | 5.47E-31 |
| my_prefix233              | 1                  | 0                | 0                       | 25                  | 0                        | 1.62E-28 |
| my_prefix263              | 0                  | 0                | 0                       | 25                  | 0                        | 1.62E-28 |
| my_prefix492              | 1                  | 0                | 0                       | 16                  | 1                        | 7.98E-20 |
| my_prefix602              | 0                  | 0                | 0                       | 16                  | 0                        | 7.98E-20 |
| my_prefix603              | 1                  | 0                | 0                       | 15                  | 0                        | 1.43E-18 |
| my_prefix782              | 1                  | 0                | 0                       | 14                  | 0                        | 2.56E-17 |
| my_prefix201              | 1                  | 3                | 4                       | 20                  | 0                        | 2.02E-16 |
| my_prefix942              | 0                  | 0                | 0                       | 13                  | 0                        | 4.58E-16 |
| my_prefix943              | 1                  | 0                | 0                       | 12                  | 0                        | 8.20E-15 |
| my_prefix1033             | 0                  | 0                | 0                       | 12                  | 0                        | 8.20E-15 |
| my_prefix1039             | 0                  | 0                | 0                       | 12                  | 0                        | 8.20E-15 |
| my_prefix553              | 0                  | 3                | 0                       | 13                  | 0                        | 8.86E-14 |
| my_prefix1035             | 0                  | 1                | 0                       | 11                  | 0                        | 1.47E-13 |
| my_prefix1233             | 0                  | 0                | 0                       | 11                  | 0                        | 1.47E-13 |
| my_prefix1036             | 1                  | 0                | 1                       | 10                  | 0                        | 2.63E-12 |
| my_prefix1018             | 2                  | 0                | 0                       | 10                  | 0                        | 2.63E-12 |
| my_prefix2055             | 0                  | 0                | 0                       | 10                  | 0                        | 2.63E-12 |
| my_prefix2060             | 0                  | 0                | 0                       | 10                  | 0                        | 2.63E-12 |
| my_prefix867              | 3                  | 0                | 0                       | 11                  | 0                        | 2.37E-11 |
| my_prefix2059             | 0                  | 1                | 0                       | 9                   | 0                        | 4.71E-11 |
| my_prefix2070             | 1                  | 0                | 0                       | 9                   | 0                        | 4.71E-11 |
| my_prefix2401             | 0                  | 0                | 0                       | 9                   | 0                        | 4.71E-11 |
| my_prefix2412             | 0                  | 0                | 0                       | 9                   | 0                        | 4.71E-11 |
| my_prefix2416             | 0                  | 0                | 0                       | 9                   | 0                        | 4.71E-11 |
| my_prefix2705             | 0                  | 0                | 0                       | 8                   | 0                        | 8.44E-10 |
| my_prefix2709             | 0                  | 0                | 0                       | 8                   | 0                        | 8.44E-10 |
| my_prefix2711             | 0                  | 0                | 0                       | 8                   | 0                        | 8.44E-10 |
| my_prefix412              | 2                  | 0                | 1                       | 12                  | 5                        | 5.74E-09 |
| my_prefix2407             | 0                  | 1                | 0                       | 7                   | 1                        | 1.51E-08 |

|                |   |   |   |    |   |          |
|----------------|---|---|---|----|---|----------|
| my_prefix2718  | 1 | 0 | 0 | 7  | 0 | 1.51E-08 |
| my_prefix3021  | 0 | 0 | 0 | 7  | 0 | 1.51E-08 |
| my_prefix3032  | 0 | 0 | 0 | 7  | 0 | 1.51E-08 |
| my_prefix3061  | 0 | 0 | 0 | 7  | 0 | 1.51E-08 |
| my_prefix142   | 1 | 9 | 6 | 15 | 3 | 7.94E-08 |
| my_prefix2409  | 1 | 1 | 1 | 6  | 0 | 2.71E-07 |
| my_prefix2410  | 1 | 0 | 1 | 6  | 1 | 2.71E-07 |
| my_prefix2411  | 1 | 1 | 1 | 6  | 0 | 2.71E-07 |
| my_prefix2704  | 1 | 1 | 0 | 6  | 0 | 2.71E-07 |
| my_prefix3723  | 0 | 0 | 0 | 6  | 0 | 2.71E-07 |
| my_prefix941   | 2 | 1 | 2 | 7  | 1 | 1.48E-06 |
| my_prefix571   | 0 | 2 | 2 | 8  | 4 | 4.70E-06 |
| my_prefix2408  | 1 | 1 | 1 | 5  | 1 | 4.85E-06 |
| my_prefix2860  | 0 | 2 | 0 | 5  | 0 | 4.85E-06 |
| my_prefix3770  | 1 | 0 | 0 | 5  | 0 | 4.85E-06 |
| my_prefix3802  | 1 | 0 | 0 | 5  | 0 | 4.85E-06 |
| my_prefix4315  | 0 | 0 | 0 | 5  | 0 | 4.85E-06 |
| my_prefix4321  | 0 | 0 | 0 | 5  | 0 | 4.85E-06 |
| my_prefix4326  | 0 | 0 | 0 | 5  | 0 | 4.85E-06 |
| my_prefix4340  | 0 | 0 | 0 | 5  | 0 | 4.85E-06 |
| my_prefix4341  | 0 | 0 | 0 | 5  | 0 | 4.85E-06 |
| my_prefix4422  | 0 | 0 | 0 | 5  | 0 | 4.85E-06 |
| my_prefix4423  | 0 | 0 | 0 | 5  | 0 | 4.85E-06 |
| my_prefix1232  | 1 | 2 | 2 | 6  | 0 | 2.21E-05 |
| my_prefix1993  | 2 | 0 | 0 | 6  | 2 | 2.21E-05 |
| my_prefix2677  | 0 | 0 | 0 | 6  | 2 | 2.21E-05 |
| my_prefix2697  | 1 | 1 | 1 | 4  | 1 | 8.68E-05 |
| my_prefix2701  | 1 | 1 | 1 | 4  | 1 | 8.68E-05 |
| my_prefix2707  | 1 | 1 | 1 | 4  | 1 | 8.68E-05 |
| my_prefix2710  | 1 | 1 | 1 | 4  | 1 | 8.68E-05 |
| my_prefix2716  | 1 | 1 | 1 | 4  | 1 | 8.68E-05 |
| my_prefix3020  | 1 | 1 | 1 | 4  | 0 | 8.68E-05 |
| my_prefix2604  | 0 | 4 | 0 | 4  | 0 | 8.68E-05 |
| my_prefix3416  | 2 | 0 | 0 | 4  | 0 | 8.68E-05 |
| my_prefix3750  | 0 | 2 | 0 | 4  | 0 | 8.68E-05 |
| my_prefix4327  | 1 | 0 | 0 | 4  | 0 | 8.68E-05 |
| my_prefix15758 | 0 | 0 | 0 | 4  | 0 | 8.68E-05 |
| my_prefix15759 | 0 | 0 | 0 | 4  | 0 | 8.68E-05 |
| my_prefix15763 | 0 | 0 | 0 | 4  | 0 | 8.68E-05 |
| my_prefix15771 | 0 | 0 | 0 | 4  | 0 | 8.68E-05 |

|                |   |   |   |   |   |             |
|----------------|---|---|---|---|---|-------------|
| my_prefix15776 | 0 | 0 | 0 | 4 | 0 | 8.68E-05    |
| my_prefix15777 | 0 | 0 | 0 | 4 | 0 | 8.68E-05    |
| my_prefix15784 | 0 | 0 | 0 | 4 | 0 | 8.68E-05    |
| my_prefix15843 | 0 | 0 | 0 | 4 | 0 | 8.68E-05    |
| my_prefix15844 | 0 | 0 | 0 | 4 | 0 | 8.68E-05    |
| my_prefix877   | 2 | 2 | 1 | 5 | 3 | 0.000318672 |
| my_prefix888   | 3 | 2 | 2 | 5 | 1 | 0.000318672 |
| my_prefix1084  | 1 | 2 | 2 | 5 | 1 | 0.000318672 |
| my_prefix2690  | 0 | 1 | 0 | 5 | 2 | 0.000318672 |
| my_prefix1034  | 1 | 1 | 3 | 6 | 1 | 0.000906578 |
| my_prefix2784  | 1 | 2 | 1 | 3 | 0 | 0.00155421  |
| my_prefix2869  | 1 | 2 | 1 | 3 | 0 | 0.00155421  |
| my_prefix2935  | 1 | 1 | 0 | 3 | 2 | 0.00155421  |
| my_prefix2996  | 1 | 2 | 0 | 3 | 1 | 0.00155421  |
| my_prefix3615  | 1 | 1 | 1 | 3 | 0 | 0.00155421  |
| my_prefix3678  | 1 | 1 | 0 | 3 | 1 | 0.00155421  |
| my_prefix3730  | 1 | 0 | 1 | 3 | 1 | 0.00155421  |
| my_prefix3749  | 1 | 0 | 1 | 3 | 1 | 0.00155421  |
| my_prefix3786  | 1 | 1 | 1 | 3 | 0 | 0.00155421  |
| my_prefix3411  | 2 | 0 | 0 | 3 | 1 | 0.00155421  |
| my_prefix4324  | 1 | 0 | 0 | 3 | 1 | 0.00155421  |
| my_prefix4333  | 1 | 0 | 1 | 3 | 0 | 0.00155421  |
| my_prefix4345  | 1 | 1 | 0 | 3 | 0 | 0.00155421  |
| my_prefix4346  | 0 | 1 | 1 | 3 | 0 | 0.00155421  |
| my_prefix4362  | 1 | 1 | 0 | 3 | 0 | 0.00155421  |
| my_prefix4424  | 1 | 0 | 1 | 3 | 0 | 0.00155421  |
| my_prefix4276  | 0 | 0 | 0 | 3 | 2 | 0.00155421  |
| my_prefix15761 | 0 | 1 | 0 | 3 | 0 | 0.00155421  |
| my_prefix15762 | 0 | 0 | 1 | 3 | 0 | 0.00155421  |
| my_prefix15770 | 1 | 0 | 0 | 3 | 0 | 0.00155421  |
| my_prefix15774 | 1 | 0 | 0 | 3 | 0 | 0.00155421  |
| my_prefix15778 | 0 | 0 | 1 | 3 | 0 | 0.00155421  |
| my_prefix15780 | 0 | 0 | 1 | 3 | 0 | 0.00155421  |
| my_prefix17863 | 0 | 0 | 0 | 3 | 0 | 0.00155421  |
| my_prefix17865 | 0 | 0 | 0 | 3 | 0 | 0.00155421  |
| my_prefix17866 | 0 | 0 | 0 | 3 | 0 | 0.00155421  |
| my_prefix17869 | 0 | 0 | 0 | 3 | 0 | 0.00155421  |
| my_prefix17870 | 0 | 0 | 0 | 3 | 0 | 0.00155421  |
| my_prefix17874 | 0 | 0 | 0 | 3 | 0 | 0.00155421  |
| my_prefix17876 | 0 | 0 | 0 | 3 | 0 | 0.00155421  |

|                |   |    |   |    |   |            |
|----------------|---|----|---|----|---|------------|
| my_prefix17877 | 0 | 0  | 0 | 3  | 0 | 0.00155421 |
| my_prefix17878 | 0 | 0  | 0 | 3  | 0 | 0.00155421 |
| my_prefix17879 | 0 | 0  | 0 | 3  | 0 | 0.00155421 |
| my_prefix17880 | 0 | 0  | 0 | 3  | 0 | 0.00155421 |
| my_prefix17881 | 0 | 0  | 0 | 3  | 0 | 0.00155421 |
| my_prefix17882 | 0 | 0  | 0 | 3  | 0 | 0.00155421 |
| my_prefix17884 | 0 | 0  | 0 | 3  | 0 | 0.00155421 |
| my_prefix17885 | 0 | 0  | 0 | 3  | 0 | 0.00155421 |
| my_prefix17886 | 0 | 0  | 0 | 3  | 0 | 0.00155421 |
| my_prefix17887 | 0 | 0  | 0 | 3  | 0 | 0.00155421 |
| my_prefix17888 | 0 | 0  | 0 | 3  | 0 | 0.00155421 |
| my_prefix17889 | 0 | 0  | 0 | 3  | 0 | 0.00155421 |
| my_prefix17895 | 0 | 0  | 0 | 3  | 0 | 0.00155421 |
| my_prefix17903 | 0 | 0  | 0 | 3  | 0 | 0.00155421 |
| my_prefix17905 | 0 | 0  | 0 | 3  | 0 | 0.00155421 |
| my_prefix17989 | 0 | 0  | 0 | 3  | 0 | 0.00155421 |
| my_prefix17990 | 0 | 0  | 0 | 3  | 0 | 0.00155421 |
| my_prefix17991 | 0 | 0  | 0 | 3  | 0 | 0.00155421 |
| my_prefix17992 | 0 | 0  | 0 | 3  | 0 | 0.00155421 |
| my_prefix17993 | 0 | 0  | 0 | 3  | 0 | 0.00155421 |
| my_prefix17994 | 0 | 0  | 0 | 3  | 0 | 0.00155421 |
| my_prefix17995 | 0 | 0  | 0 | 3  | 0 | 0.00155421 |
| my_prefix17996 | 0 | 0  | 0 | 3  | 0 | 0.00155421 |
| my_prefix17997 | 0 | 0  | 0 | 3  | 0 | 0.00155421 |
| my_prefix17998 | 0 | 0  | 0 | 3  | 0 | 0.00155421 |
| my_prefix17999 | 0 | 0  | 0 | 3  | 0 | 0.00155421 |
| my_prefix18000 | 0 | 0  | 0 | 3  | 0 | 0.00155421 |
| my_prefix79    | 8 | 9  | 8 | 13 | 8 | 0.00194091 |
| my_prefix947   | 1 | 4  | 2 | 4  | 1 | 0.00743951 |
| my_prefix1931  | 1 | 2  | 2 | 4  | 1 | 0.00743951 |
| my_prefix2414  | 1 | 1  | 2 | 4  | 1 | 0.00743951 |
| my_prefix2061  | 2 | 2  | 2 | 4  | 0 | 0.00743951 |
| my_prefix2703  | 1 | 1  | 2 | 4  | 0 | 0.00743951 |
| my_prefix535   | 0 | 12 | 0 | 4  | 0 | 0.00743951 |

---

| Contract 89<br>orthogroups | <i>A. thaliana</i> | <i>A. lyrata</i> | <i>Capsella<br/>rubella</i> | <i>C. himalaica</i> | <i>Cardamine<br/>hirsuta</i> | <i>P</i> value |
|----------------------------|--------------------|------------------|-----------------------------|---------------------|------------------------------|----------------|
| my_prefix7                 | 34                 | 15               | 47                          | 15                  | 37                           | 5.03E-11       |
| my_prefix14                | 16                 | 16               | 29                          | 6                   | 25                           | 1.26E-10       |
| my_prefix126               | 16                 | 3                | 11                          | 0                   | 6                            | 2.02E-09       |



|              |    |    |    |    |    |             |
|--------------|----|----|----|----|----|-------------|
| my_prefix42  | 25 | 7  | 14 | 4  | 15 | 4.64E-08    |
| my_prefix2   | 32 | 28 | 52 | 26 | 54 | 1.75E-07    |
| my_prefix9   | 27 | 25 | 23 | 12 | 32 | 4.02E-07    |
| my_prefix78  | 13 | 6  | 14 | 3  | 10 | 1.45E-06    |
| my_prefix57  | 15 | 10 | 17 | 4  | 8  | 3.02E-06    |
| my_prefix56  | 12 | 12 | 15 | 5  | 11 | 5.73E-06    |
| my_prefix407 | 3  | 4  | 4  | 0  | 9  | 6.62E-06    |
| my_prefix410 | 10 | 1  | 4  | 0  | 5  | 6.62E-06    |
| my_prefix572 | 4  | 4  | 4  | 0  | 4  | 6.62E-06    |
| my_prefix80  | 21 | 2  | 13 | 3  | 7  | 3.55E-05    |
| my_prefix92  | 11 | 13 | 12 | 3  | 3  | 3.55E-05    |
| my_prefix35  | 19 | 12 | 17 | 7  | 15 | 3.72E-05    |
| my_prefix187 | 11 | 2  | 12 | 1  | 3  | 6.51E-05    |
| my_prefix203 | 7  | 5  | 5  | 1  | 9  | 6.51E-05    |
| my_prefix163 | 7  | 12 | 8  | 2  | 2  | 0.000138711 |
| my_prefix213 | 7  | 4  | 7  | 2  | 7  | 0.000138711 |
| my_prefix231 | 6  | 6  | 10 | 2  | 2  | 0.000138711 |
| my_prefix355 | 1  | 1  | 16 | 0  | 3  | 0.000199561 |
| my_prefix522 | 2  | 7  | 5  | 0  | 3  | 0.000199561 |
| my_prefix778 | 8  | 1  | 4  | 0  | 2  | 0.000199561 |
| my_prefix909 | 4  | 4  | 3  | 0  | 2  | 0.000199561 |
| my_prefix950 | 1  | 4  | 4  | 0  | 3  | 0.000199561 |
| my_prefix166 | 0  | 0  | 29 | 0  | 2  | 0.000199561 |
| my_prefix6   | 30 | 42 | 27 | 19 | 35 | 0.000202751 |
| my_prefix107 | 10 | 10 | 8  | 3  | 8  | 0.000259537 |
| my_prefix11  | 25 | 9  | 24 | 14 | 28 | 0.000324624 |
| my_prefix41  | 12 | 17 | 17 | 8  | 12 | 0.000329454 |
| my_prefix23  | 18 | 17 | 16 | 9  | 17 | 0.000454826 |
| my_prefix28  | 16 | 15 | 15 | 9  | 18 | 0.000454826 |
| my_prefix269 | 6  | 4  | 5  | 1  | 8  | 0.000557948 |
| my_prefix352 | 9  | 2  | 5  | 1  | 4  | 0.000557948 |
| my_prefix425 | 5  | 7  | 5  | 1  | 1  | 0.000557948 |
| my_prefix483 | 3  | 4  | 4  | 1  | 6  | 0.000557948 |
| my_prefix528 | 4  | 2  | 5  | 1  | 5  | 0.000557948 |
| my_prefix262 | 7  | 0  | 13 | 1  | 4  | 0.000557948 |
| my_prefix13  | 21 | 20 | 17 | 11 | 23 | 0.000799865 |
| my_prefix58  | 11 | 12 | 11 | 6  | 13 | 0.00102558  |
| my_prefix267 | 4  | 6  | 8  | 2  | 4  | 0.00116835  |
| my_prefix33  | 13 | 25 | 12 | 7  | 14 | 0.00144968  |
| my_prefix132 | 7  | 8  | 7  | 3  | 10 | 0.0020644   |

|               |    |    |    |    |    |            |
|---------------|----|----|----|----|----|------------|
| my_prefix135  | 5  | 6  | 8  | 3  | 13 | 0.0020644  |
| my_prefix180  | 8  | 6  | 7  | 3  | 5  | 0.0020644  |
| my_prefix1016 | 3  | 2  | 5  | 0  | 2  | 0.00215496 |
| my_prefix1205 | 2  | 2  | 6  | 0  | 1  | 0.00215496 |
| my_prefix1213 | 2  | 3  | 2  | 0  | 4  | 0.00215496 |
| my_prefix2100 | 1  | 2  | 4  | 0  | 2  | 0.00215496 |
| my_prefix2142 | 1  | 3  | 4  | 0  | 1  | 0.00215496 |
| my_prefix2267 | 3  | 2  | 2  | 0  | 2  | 0.00215496 |
| my_prefix2279 | 1  | 3  | 2  | 0  | 3  | 0.00215496 |
| my_prefix2284 | 3  | 3  | 2  | 0  | 1  | 0.00215496 |
| my_prefix2466 | 1  | 2  | 4  | 0  | 1  | 0.00215496 |
| my_prefix2517 | 3  | 2  | 2  | 0  | 1  | 0.00215496 |
| my_prefix2622 | 3  | 2  | 2  | 0  | 1  | 0.00215496 |
| my_prefix2937 | 1  | 2  | 2  | 0  | 2  | 0.00215496 |
| my_prefix873  | 2  | 1  | 11 | 0  | 0  | 0.00215496 |
| my_prefix874  | 1  | 2  | 11 | 0  | 0  | 0.00215496 |
| my_prefix1030 | 1  | 0  | 8  | 0  | 3  | 0.00215496 |
| my_prefix2278 | 2  | 3  | 4  | 0  | 0  | 0.00215496 |
| my_prefix2314 | 0  | 3  | 3  | 0  | 3  | 0.00215496 |
| my_prefix2343 | 3  | 1  | 5  | 0  | 0  | 0.00215496 |
| my_prefix2587 | 1  | 4  | 3  | 0  | 0  | 0.00215496 |
| my_prefix2591 | 3  | 3  | 2  | 0  | 0  | 0.00215496 |
| my_prefix2852 | 2  | 3  | 2  | 0  | 0  | 0.00215496 |
| my_prefix2947 | 2  | 0  | 2  | 0  | 3  | 0.00215496 |
| my_prefix3100 | 2  | 2  | 2  | 0  | 0  | 0.00215496 |
| my_prefix3438 | 2  | 0  | 2  | 0  | 2  | 0.00215496 |
| my_prefix3466 | 2  | 0  | 2  | 0  | 2  | 0.00215496 |
| my_prefix1038 | 0  | 0  | 10 | 0  | 2  | 0.00215496 |
| my_prefix2723 | 0  | 0  | 6  | 0  | 2  | 0.00215496 |
| my_prefix98   | 9  | 11 | 7  | 4  | 10 | 0.00326544 |
| my_prefix113  | 14 | 4  | 13 | 4  | 4  | 0.00326544 |
| my_prefix146  | 12 | 2  | 8  | 4  | 8  | 0.00326544 |
| my_prefix34   | 13 | 13 | 20 | 10 | 15 | 0.00333104 |
| my_prefix77   | 6  | 17 | 12 | 5  | 6  | 0.0047797  |
| my_prefix97   | 12 | 10 | 9  | 5  | 5  | 0.0047797  |
| my_prefix275  | 2  | 15 | 4  | 1  | 2  | 0.00569599 |
| my_prefix393  | 6  | 6  | 3  | 1  | 4  | 0.00569599 |
| my_prefix476  | 6  | 5  | 3  | 1  | 3  | 0.00569599 |
| my_prefix570  | 3  | 4  | 5  | 1  | 3  | 0.00569599 |
| my_prefix607  | 4  | 4  | 5  | 1  | 1  | 0.00569599 |

|              |    |    |    |    |    |            |
|--------------|----|----|----|----|----|------------|
| my_prefix864 | 2  | 3  | 4  | 1  | 4  | 0.00569599 |
| my_prefix939 | 3  | 1  | 3  | 1  | 5  | 0.00569599 |
| my_prefix965 | 3  | 4  | 3  | 1  | 1  | 0.00569599 |
| my_prefix938 | 1  | 0  | 6  | 1  | 5  | 0.00569599 |
| my_prefix1   | 61 | 64 | 37 | 35 | 95 | 0.00647362 |
| my_prefix8   | 21 | 16 | 20 | 15 | 47 | 0.00868273 |

---

**Table S14. List of 610 positively selected genes in *C. himalaica* (Chi) genome.**

| orthogroups    | Ks/Ks value | $\chi^2$ square test | <i>C. himalaica</i> | Orthologs in <i>A. thaliana</i> |
|----------------|-------------|----------------------|---------------------|---------------------------------|
| my_prefix8199  | 999         | 7.04606E-58          | Chi 21.54           | AT2G22530                       |
| my_prefix8675  | 999         | 9.43586E-48          | Chi 4.600           | AT2G41080                       |
| my_prefix4981  | 999         | 1.85719E-43          | Chi 8.748.1         | AT3G63400                       |
| my_prefix5832  | 999         | 6.51373E-43          | Chi 16.499          | AT1G03160                       |
| my_prefix8730  | 998.9946    | 2.82378E-40          | Chi 4.819           | AT2G43370                       |
| my_prefix11989 | 999         | 4.98088E-38          | Chi 24.37.1         | AT5G66850                       |
| my_prefix11800 | 999         | 4.70655E-36          | Chi 1.1026          | AT5G60450                       |
| my_prefix11581 | 999         | 4.44968E-32          | Chi 1.287           | AT5G52790                       |
| my_prefix14718 | 999         | 2.9231E-31           | Chi 9.720           | AT5G20680                       |
| my_prefix8289  | 999         | 7.36471E-31          | Chi 5.987           | AT2G26930                       |
| my_prefix12977 | 999         | 1.80631E-30          | Chi 10.285          | AT1G10660                       |
| my_prefix10457 | 256.6443    | 8.72039E-27          | Chi 22.314          | AT4G38380                       |
| my_prefix10487 | 999         | 1.33888E-26          | Chi 22.405          | AT4G39410                       |
| my_prefix5603  | 999         | 2.98105E-26          | Chi 24.16           | AT5G01930                       |
| my_prefix6789  | 999         | 3.46548E-26          | Chi 63.63           | AT1G64600                       |
| my_prefix7671  | 106.5766    | 4.04042E-26          | Chi 7.654           | AT3G13490                       |
| my_prefix4851  | 999         | 4.92021E-26          | Chi 4.365           | AT2G38780                       |
| my_prefix13985 | 179.9911    | 1.11134E-25          | Chi 28.145          | AT2G32900                       |
| my_prefix11037 | 998.9987    | 2.60525E-25          | Chi 17.377          | AT4G19140                       |
| my_prefix9496  | 999         | 3.71289E-25          | Chi 8.711.1         | AT3G61860                       |
| my_prefix11158 | 127.9338    | 4.98163E-25          | Chi 42.24           | AT4G14850                       |
| my_prefix13443 | 150.8536    | 2.91815E-24          | Chi 4.583           | AT2G40890                       |
| my_prefix5669  | 999         | 3.22797E-24          | Chi 22.311          | AT4G38360                       |
| my_prefix8086  | 86.29101    | 4.30376E-24          | Chi 144.2.1         | AT2G16900                       |
| my_prefix4322  | 357.5595    | 1.67526E-23          | Chi 189.11          | AT4G04320                       |
| my_prefix15094 | 127.1085    | 3.57445E-23          | Chi 17.167.1        | AT4G24240                       |
| my_prefix10586 | 999         | 1.18597E-22          | Chi 6.325           | AT4G35180                       |
| my_prefix8871  | 703.7999    | 1.61277E-22          | Chi 22.7            | AT2G48120                       |
| my_prefix13638 | 998.9999    | 1.79443E-22          | Chi 7.831           | AT3G11620                       |
| my_prefix6710  | 999         | 2.343E-22            | Chi 57.150.2        | AT1G53560                       |
| my_prefix13675 | 96.90223    | 3.45717E-22          | Chi 7.567           | AT3G14220                       |
| my_prefix4629  | 73.63647    | 4.30094E-22          | Chi 115.17          | AT1G67790                       |
| my_prefix13436 | 999         | 7.75494E-22          | Chi 2.720           | AT1G73805                       |
| my_prefix4760  | 320.2743    | 1.03196E-21          | Chi 48.55.1         | AT3G20070                       |
| my_prefix14276 | 170.1041    | 2.26116E-21          | Chi 172.18          | AT3G47440                       |
| my_prefix12245 | 187.0145    | 6.33277E-21          | Chi 76.20           | AT5G25340                       |
| my_prefix9643  | 97.29217    | 2.07716E-20          | Chi 3.784.1         | AT5G04740                       |
| my_prefix9461  | 119.7033    | 3.7351E-20           | Chi 8.606           | AT3G60690                       |

|                |          |             |              |           |
|----------------|----------|-------------|--------------|-----------|
| my_prefix6996  | 999      | 6.78406E-20 | Chi 2.968.1  | AT1G69230 |
| my_prefix8895  | 999      | 7.27061E-20 | Chi 70.108   | AT2G01690 |
| my_prefix4547  | 719.0144 | 1.00175E-19 | Chi 178.1    | AT1G32770 |
| my_prefix14847 | 877.9543 | 1.12898E-19 | Chi 189.3    | AT4G04470 |
| my_prefix8642  | 999      | 2.13951E-19 | Chi 4.499.1  | AT2G40095 |
| my_prefix13962 | 886.5911 | 2.20275E-19 | Chi 37.57.2  | AT2G30695 |
| my_prefix9931  | 395.5537 | 2.48824E-19 | Chi 9.202.1  | AT5G15170 |
| my_prefix13530 | 999      | 2.6299E-19  | Chi 13.708   | AT3G02420 |
| my_prefix7884  | 999      | 5.00915E-19 | Chi 109.7    | AT3G21215 |
| my_prefix10911 | 138.6568 | 1.33254E-18 | Chi 17.175   | AT4G24175 |
| my_prefix6394  | 999      | 1.56212E-18 | Chi 46.214   | AT1G27520 |
| my_prefix12113 | 999      | 1.75498E-18 | Chi 92.62    | AT4G18070 |
| my_prefix12585 | 107.32   | 2.07263E-18 | Chi 2.928    | AT1G69540 |
| my_prefix11706 | 771.2728 | 2.79514E-18 | Chi 1.734.1  | AT5G57300 |
| my_prefix11914 | 999      | 8.34407E-18 | Chi 1.1392   | AT5G64200 |
| my_prefix12827 | 999      | 8.50341E-18 | Chi 1.822    | AT5G58200 |
| my_prefix9056  | 700.0196 | 8.99269E-18 | Chi 44.96    | AT3G43540 |
| my_prefix5602  | 999      | 1.24535E-17 | Chi 8.759    | AT3G63500 |
| my_prefix14175 | 999      | 1.69481E-17 | Chi 84.28.1  | AT2G47710 |
| my_prefix5751  | 998.9999 | 2.47198E-17 | Chi 1.1094   | AT5G61150 |
| my_prefix13226 | 49.25852 | 2.68864E-17 | Chi 107.13   | AT1G49130 |
| my_prefix5854  | 999      | 2.71126E-17 | Chi 16.413   | AT1G04130 |
| my_prefix10652 | 722.2215 | 3.01312E-17 | Chi 6.570    | AT4G32720 |
| my_prefix6491  | 658.4021 | 3.44181E-17 | Chi 88.15    | AT1G32190 |
| my_prefix11886 | 999      | 3.71599E-17 | Chi 1.1295.1 | AT5G63220 |
| my_prefix7163  | 595.9938 | 7.34238E-17 | Chi 2.551    | AT1G75490 |
| my_prefix6194  | 999      | 2.21762E-16 | Chi 5.324    | AT1G17210 |
| my_prefix10793 | 999      | 3.89519E-16 | Chi 6.1041   | AT4G28025 |
| my_prefix8783  | 724.7912 | 5.81904E-16 | Chi 4.975    | AT2G45010 |
| my_prefix5893  | 66.7493  | 5.99786E-16 | Chi 16.261   | AT1G05577 |
| my_prefix12161 | 999      | 1.15496E-15 | Chi 200.20   | AT5G01660 |
| my_prefix4995  | 140.2265 | 1.17415E-15 | Chi 3.738.1  | AT5G05240 |
| my_prefix9440  | 975.4896 | 1.53327E-15 | Chi 8.532    | AT3G59960 |
| my_prefix12694 | 552.8538 | 1.72451E-15 | Chi 5.662    | AT1G20890 |
| my_prefix13913 | 97.66143 | 1.82282E-15 | Chi 181.2    | AT2G25420 |
| my_prefix5054  | 999      | 2.17702E-15 | Chi 28.4     | AT4G06676 |
| my_prefix4484  | 999      | 2.30707E-15 | Chi 5.46     | AT1G14310 |
| my_prefix6372  | 214.486  | 2.4317E-15  | Chi 46.93    | AT1G25540 |
| my_prefix10923 | 934.3238 | 2.61372E-15 | Chi 17.209   | AT4G23860 |
| my_prefix13340 | 991.5837 | 3.11178E-15 | Chi 130.9.1  | AT1G65030 |

|                |          |             |              |           |
|----------------|----------|-------------|--------------|-----------|
| my_prefix10194 | 999      | 5.18199E-15 | Chi 47.106.1 | AT5G25150 |
| my_prefix12577 | 985.6077 | 7.00357E-15 | Chi 29.10    | AT1G67570 |
| my_prefix5579  | 998.9995 | 7.06497E-15 | Chi 31.255   | AT3G51360 |
| my_prefix15301 | 755.8708 | 9.08976E-15 | Chi 44.80    | AT5G43300 |
| my_prefix10158 | 999      | 1.17004E-14 | Chi 26.51    | AT5G23570 |
| my_prefix6786  | 101.4926 | 1.18473E-14 | Chi 63.74.1  | AT1G64680 |
| my_prefix9500  | 739.8918 | 1.40557E-14 | Chi 8.724    | AT3G61970 |
| my_prefix14172 | 763.652  | 1.72226E-14 | Chi 84.17    | AT2G47600 |
| my_prefix9715  | 56.06483 | 1.9564E-14  | Chi 3.572    | AT5G06980 |
| my_prefix12087 | 999      | 2.31175E-14 | Chi 6.976    | AT4G28670 |
| my_prefix13888 | 999      | 2.31962E-14 | Chi 40.110.2 | AT2G21385 |
| my_prefix14795 | 999      | 2.52392E-14 | Chi 14.133.1 | AT5G27390 |
| my_prefix9542  | 998.9987 | 3.28023E-14 | Chi 200.13   | AT5G01730 |
| my_prefix13579 | 999      | 5.97944E-14 | Chi 13.197   | AT3G07170 |
| my_prefix8666  | 999      | 6.34838E-14 | Chi 4.579    | AT2G40840 |
| my_prefix9707  | 187.645  | 7.83516E-14 | Chi 3.592    | AT5G06780 |
| my_prefix6778  | 882.3825 | 1.59535E-13 | Chi 84.61    | AT1G56460 |
| my_prefix10030 | 747.5815 | 1.95667E-13 | Chi 9.514    | AT5G18540 |
| my_prefix7672  | 728.484  | 2.20672E-13 | Chi 7.649.1  | AT3G13550 |
| my_prefix14138 | 632.4499 | 2.30873E-13 | Chi 4.993    | AT2G45210 |
| my_prefix8380  | 325.9039 | 2.51287E-13 | Chi 37.58    | AT2G30700 |
| my_prefix5749  | 178.3868 | 2.79878E-13 | Chi 1.1089   | AT5G61100 |
| my_prefix4883  | 702.1731 | 3.01066E-13 | Chi 4.1181   | AT2G47115 |
| my_prefix9844  | 409.3438 | 4.36218E-13 | Chi 3.108    | AT5G12300 |
| my_prefix9483  | 101.5436 | 4.52335E-13 | Chi 8.663    | AT3G61410 |
| my_prefix11908 | 77.5604  | 4.71293E-13 | Chi 1.1379   | AT5G64050 |
| my_prefix6254  | 100.0227 | 5.79349E-13 | Chi 5.573.1  | AT1G19860 |
| my_prefix6882  | 999      | 6.49342E-13 | Chi 175.5    | AT1G58170 |
| my_prefix5515  | 376.9078 | 9.58236E-13 | Chi 19.163   | AT2G24700 |
| my_prefix7319  | 306.2678 | 9.90446E-13 | Chi 13.793   | AT3G01470 |
| my_prefix12650 | 412.9086 | 1.07076E-12 | Chi 16.75    | AT1G07540 |
| my_prefix8607  | 147.7658 | 1.244E-12   | Chi 4.387    | AT2G39000 |
| my_prefix7099  | 976.1028 | 1.65257E-12 | Chi 2.775    | AT1G73210 |
| my_prefix9648  | 999      | 1.80341E-12 | Chi 3.770    | AT5G04890 |
| my_prefix15005 | 999      | 2.20548E-12 | Chi 6.614    | AT4G32320 |
| my_prefix11811 | 335.8491 | 2.27457E-12 | Chi 1.1068   | AT5G60870 |
| my_prefix6901  | 179.4789 | 4.9062E-12  | Chi 87.53    | AT1G65410 |
| my_prefix5552  | 999      | 5.1661E-12  | Chi 70.126   | AT2G01510 |
| my_prefix9959  | 186.3312 | 6.03195E-12 | Chi 9.283    | AT5G16020 |
| my_prefix8037  | 107.1065 | 6.59379E-12 | Chi 103.7.1  | AT2G14910 |

|                |          |             |              |           |
|----------------|----------|-------------|--------------|-----------|
| my_prefix12186 | 999      | 1.08739E-11 | Chi 3.394    | AT5G09250 |
| my_prefix8865  | 84.0506  | 1.11034E-11 | Chi 22.30.1  | AT2G47890 |
| my_prefix12380 | 99.33731 | 1.15419E-11 | Chi 65.17    | AT2G27500 |
| my_prefix12304 | 793.8369 | 1.15697E-11 | Chi 97.8.1   | AT3G29760 |
| my_prefix13008 | 999      | 1.15983E-11 | Chi 5.71     | AT1G14520 |
| my_prefix5693  | 624.0751 | 1.52386E-11 | Chi 173.42   | AT4G25990 |
| my_prefix9012  | 64.9394  | 1.56628E-11 | Chi 15.49    | AT3G27860 |
| my_prefix5790  | 295.1486 | 2.81085E-11 | Chi 84.41    | AT1G01770 |
| my_prefix12230 | 649.6275 | 3.08892E-11 | Chi 9.632    | AT5G19710 |
| my_prefix10529 | 998.9986 | 4.41373E-11 | Chi 6.164    | AT4G37050 |
| my_prefix13532 | 998.9966 | 4.92364E-11 | Chi 13.705   | AT3G02450 |
| my_prefix5506  | 999      | 5.46118E-11 | Chi 42.158   | AT2G18800 |
| my_prefix4823  | 998.9985 | 6.04882E-11 | Chi 30.83    | AT2G31530 |
| my_prefix12325 | 223.9698 | 6.87259E-11 | Chi 31.163   | AT3G50360 |
| my_prefix15407 | 998.9997 | 6.89227E-11 | Chi 1.541    | AT5G55130 |
| my_prefix10358 | 799.2069 | 8.44083E-11 | Chi 15.214.1 | AT4G05060 |
| my_prefix7215  | 69.727   | 1.0853E-10  | Chi 2.340    | AT1G77765 |
| my_prefix4662  | 998.9992 | 1.12863E-10 | Chi 2.649    | AT1G74490 |
| my_prefix6339  | 71.32238 | 1.22505E-10 | Chi 5.947    | AT1G23890 |
| my_prefix5788  | 120.946  | 1.24497E-10 | Chi 84.48.2  | AT1G01860 |
| my_prefix6988  | 63.09138 | 1.52059E-10 | Chi 2.989    | AT1G69020 |
| my_prefix13515 | 998.9992 | 1.53828E-10 | Chi 194.8    | AT1G80030 |
| my_prefix10425 | 999      | 1.93707E-10 | Chi 185.27   | AT4G01250 |
| my_prefix12148 | 396.8602 | 2.11099E-10 | Chi 80.76    | AT5G40645 |
| my_prefix6452  | 772.0402 | 2.26649E-10 | Chi 78.84    | AT1G30090 |
| my_prefix9021  | 999      | 2.44695E-10 | Chi 47.1     | AT3G28370 |
| my_prefix10756 | 62.98033 | 2.63864E-10 | Chi 6.938    | AT4G29070 |
| my_prefix12232 | 638.0679 | 3.67181E-10 | Chi 9.750    | AT5G21040 |
| my_prefix13148 | 514.2844 | 3.85848E-10 | Chi 115.66   | AT1G29195 |
| my_prefix7601  | 79.70386 | 3.99273E-10 | Chi 7.868    | AT3G11220 |
| my_prefix13441 | 998.9979 | 4.41331E-10 | Chi 2.668    | AT1G74320 |
| my_prefix7382  | 169.5409 | 5.80496E-10 | Chi 13.581   | AT3G03550 |
| my_prefix13945 | 767.0305 | 7.23013E-10 | Chi 18.20    | AT2G28050 |
| my_prefix12312 | 108.9272 | 7.31872E-10 | Chi 98.38    | AT3G45280 |
| my_prefix8479  | 999      | 8.41748E-10 | Chi 12.204   | AT2G34925 |
| my_prefix12384 | 229.5282 | 8.87643E-10 | Chi 38.11    | AT2G27760 |
| my_prefix10212 | 133.4873 | 9.20985E-10 | Chi 7.991    | AT5G26040 |
| my_prefix13539 | 562.1473 | 1.06895E-09 | Chi 13.621.1 | AT3G03180 |
| my_prefix6162  | 998.9999 | 1.14718E-09 | Chi 5.184    | AT1G15740 |
| my_prefix8477  | 629.5224 | 1.70803E-09 | Chi 12.211   | AT2G34860 |

|                |          |             |              |           |
|----------------|----------|-------------|--------------|-----------|
| my_prefix13193 | 999      | 1.88176E-09 | Chi 80.92.2  | AT1G35160 |
| my_prefix5033  | 999      | 1.90561E-09 | Chi 9.472    | AT5G18100 |
| my_prefix14634 | 806.2232 | 2.18465E-09 | Chi 9.187    | AT5G15010 |
| my_prefix4787  | 786.5175 | 2.27078E-09 | Chi 95.33    | AT2G19385 |
| my_prefix9480  | 59.59266 | 2.3016E-09  | Chi 3G61230  | AT3G61230 |
| my_prefix13124 | 182.1656 | 2.39037E-09 | Chi 46.177   | AT1G24350 |
| my_prefix6522  | 999      | 2.66356E-09 | Chi 54.14    | AT1G33980 |
| my_prefix6785  | 54.70671 | 3.0099E-09  | Chi 63.76    | AT1G64700 |
| my_prefix11726 | 200.5147 | 3.33732E-09 | Chi 1.785.1  | AT5G57860 |
| my_prefix11911 | 114.011  | 3.42685E-09 | Chi 1.1385.1 | AT5G64130 |
| my_prefix15278 | 85.58334 | 3.63287E-09 | Chi 36.48    | AT5G45980 |
| my_prefix11121 | 999      | 3.67804E-09 | Chi 50.133   | AT4G16460 |
| my_prefix6913  | 154.8865 | 3.79916E-09 | Chi 19.93    | AT1G66260 |
| my_prefix12635 | 126.7407 | 4.55782E-09 | Chi 16.456   | AT1G03687 |
| my_prefix7085  | 999      | 4.56086E-09 | Chi 2.828.2  | AT1G72740 |
| my_prefix11567 | 88.24252 | 5.48167E-09 | Chi 1.253    | AT5G52270 |
| my_prefix13411 | 998.9978 | 6.19353E-09 | Chi 25.260   | AT1G71420 |
| my_prefix11809 | 999      | 8.27915E-09 | Chi 1.1057   | AT5G60750 |
| my_prefix7328  | 999      | 8.39985E-09 | Chi 13.755   | AT3G01140 |
| my_prefix6223  | 97.76815 | 8.53215E-09 | Chi 5.466    | AT1G18700 |
| my_prefix7293  | 998.9998 | 8.63522E-09 | Chi 194.21   | AT1G79890 |
| my_prefix10085 | 206.2081 | 9.38394E-09 | Chi 9.681    | AT5G20240 |
| my_prefix10472 | 173.6853 | 9.88852E-09 | Chi 22.354   | AT4G38940 |
| my_prefix8683  | 999      | 1.11035E-08 | Chi 4.634.1  | AT2G41420 |
| my_prefix10538 | 998.9989 | 1.33197E-08 | Chi 6.141    | AT4G36850 |
| my_prefix15544 | 722.0865 | 1.35611E-08 | Chi 1.1516.1 | AT5G65480 |
| my_prefix14158 | 59.3121  | 1.36217E-08 | Chi 4.1145   | AT2G46770 |
| my_prefix5248  | 999      | 1.364E-08   | Chi 1.582    | AT5G55570 |
| my_prefix8603  | 38.00033 | 1.61544E-08 | Chi 4.370    | AT2G38823 |
| my_prefix8713  | 999      | 1.74316E-08 | Chi 4.758    | AT2G42760 |
| my_prefix14474 | 64.01463 | 1.77511E-08 | Chi 24.18    | AT5G01910 |
| my_prefix7185  | 82.26793 | 1.83174E-08 | Chi 2.464    | AT1G76450 |
| my_prefix6199  | 999      | 1.87514E-08 | Chi 5.335    | AT1G17330 |
| my_prefix15157 | 67.94037 | 1.87651E-08 | Chi 50.55    | AT4G17220 |
| my_prefix14900 | 998.9973 | 1.98143E-08 | Chi 22.306   | AT4G38260 |
| my_prefix15175 | 999      | 2.26927E-08 | Chi 50.191   | AT4G16008 |
| my_prefix4691  | 999      | 2.28045E-08 | Chi 194.34   | AT1G79780 |
| my_prefix12475 | 347.8758 | 2.37399E-08 | Chi 13.119   | AT3G07970 |
| my_prefix10674 | 53.70784 | 2.41162E-08 | Chi 6.645    | AT4G31990 |
| my_prefix5942  | 80.93217 | 2.61655E-08 | Chi 16.45.1  | AT1G07890 |



|                |          |             |              |           |
|----------------|----------|-------------|--------------|-----------|
| my_prefix12848 | 124.0201 | 2.74442E-08 | Chi 24.38    | AT5G66840 |
| my_prefix6000  | 105.5329 | 3.84312E-08 | Chi 77.61    | AT1G09760 |
| my_prefix4888  | 129.6384 | 3.89638E-08 | Chi 22.17    | AT2G48030 |
| my_prefix7299  | 670.6131 | 3.90176E-08 | Chi 22.224   | AT1G79730 |
| my_prefix6706  | 94.94362 | 3.99135E-08 | Chi 57.176   | AT1G53250 |
| my_prefix13555 | 172.9931 | 4.42089E-08 | Chi 13.488   | AT3G04560 |
| my_prefix9469  | 346.2925 | 4.62596E-08 | Chi 8.625    | AT3G60870 |
| my_prefix6711  | 999      | 5.45047E-08 | Chi 57.149   | AT1G53570 |
| my_prefix4443  | 58.70073 | 5.67982E-08 | Chi 16.621   | AT1G01290 |
| my_prefix11091 | 913.101  | 5.84376E-08 | Chi 50.32    | AT4G17440 |
| my_prefix10452 | 531.8559 | 5.96713E-08 | Chi 2.38     | AT1G05940 |
| my_prefix11669 | 999      | 7.05262E-08 | Chi 1.607    | AT5G55850 |
| my_prefix12620 | 94.19065 | 7.42946E-08 | Chi 2.81     | AT1G80320 |
| my_prefix8150  | 545.1781 | 7.65778E-08 | Chi 27.161   | AT2G20515 |
| my_prefix9028  | 25.78219 | 7.73134E-08 | Chi 66.72    | AT3G28840 |
| my_prefix6197  | 212.3401 | 8.0522E-08  | Chi 5.332    | AT1G17285 |
| my_prefix10229 | 999      | 8.78224E-08 | Chi 127.41   | AT5G26960 |
| my_prefix14301 | 999      | 1.0515E-07  | Chi 31.83.2  | AT3G49430 |
| my_prefix13635 | 999      | 1.07731E-07 | Chi 7.847    | AT3G11460 |
| my_prefix11765 | 998.9999 | 1.27714E-07 | Chi 1.908    | AT5G59020 |
| my_prefix6517  | 999      | 1.28129E-07 | Chi 81.55    | AT1G33470 |
| my_prefix12357 | 89.85695 | 1.37504E-07 | Chi 40.107.1 | AT2G21370 |
| my_prefix9160  | 999      | 1.65953E-07 | Chi 31.122   | AT3G49840 |
| my_prefix8594  | 150.1622 | 1.66342E-07 | Chi 4.351    | AT2G38660 |
| my_prefix14817 | 998.9995 | 1.6699E-07  | Chi 74.52.1  | AT4G09140 |
| my_prefix7743  | 999      | 1.91575E-07 | Chi 7.402    | AT3G15770 |
| my_prefix9065  | 48.38557 | 1.97799E-07 | Chi 191.5    | AT3G44460 |
| my_prefix14077 | 64.84437 | 2.17797E-07 | Chi 4.538    | AT2G40430 |
| my_prefix5654  | 32.11977 | 2.44527E-07 | Chi 62.21    | AT5G28000 |
| my_prefix8010  | 66.76146 | 2.51503E-07 | Chi 58.36    | AT2G06530 |
| my_prefix11900 | 79.4558  | 2.61379E-07 | Chi 1.1358.1 | AT5G63880 |
| my_prefix6142  | 112.4607 | 2.62897E-07 | Chi 5.115    | AT1G14990 |
| my_prefix14644 | 998.9991 | 2.72627E-07 | Chi 9.246.1  | AT5G15640 |
| my_prefix7437  | 346.3074 | 2.72742E-07 | Chi 13.412   | AT3G05210 |
| my_prefix10621 | 168.3125 | 2.86257E-07 | Chi 6.465    | AT4G33760 |
| my_prefix9450  | 94.41276 | 3.42648E-07 | Chi 8.571    | AT3G60370 |
| my_prefix14874 | 576.026  | 3.86439E-07 | Chi 32.30    | AT4G02405 |
| my_prefix10564 | 179.7999 | 3.93384E-07 | Chi 6.253    | AT4G35880 |
| my_prefix14554 | 81.0842  | 4.19292E-07 | Chi 3.468    | AT5G08130 |
| my_prefix11263 | 851.5797 | 4.2483E-07  | Chi 24.272   | AT5G40450 |

|                |          |             |              |           |
|----------------|----------|-------------|--------------|-----------|
| my_prefix12193 | 84.36774 | 4.25203E-07 | Chi 3.237    | AT5G10890 |
| my_prefix11976 | 938.1487 | 4.41909E-07 | Chi 1.1590   | AT5G67370 |
| my_prefix8459  | 998.9995 | 4.56839E-07 | Chi 12.273   | AT2G34310 |
| my_prefix8798  | 561.7236 | 5.17291E-07 | Chi 4.1031   | AT2G45650 |
| my_prefix8859  | 998.9967 | 5.55542E-07 | Chi 84.16    | AT2G47590 |
| my_prefix10400 | 999      | 5.82002E-07 | Chi 3.7      | AT4G02075 |
| my_prefix10447 | 44.44427 | 6.29216E-07 | Chi 2.53     | AT4G00120 |
| my_prefix13623 | 239.493  | 6.51485E-07 | Chi 7.954    | AT3G10380 |
| my_prefix6024  | 107.7665 | 6.73931E-07 | Chi 10.286.1 | AT1G10657 |
| my_prefix6911  | 31.4903  | 6.83238E-07 | Chi 2.1072   | AT1G66235 |
| my_prefix8761  | 169.7608 | 6.87761E-07 | Chi 4.918.2  | AT2G44440 |
| my_prefix15432 | 999      | 6.99338E-07 | Chi 1.696    | AT5G56970 |
| my_prefix11310 | 95.21405 | 7.05162E-07 | Chi 49.42.1  | AT5G47570 |
| my_prefix10767 | 998.9982 | 7.09482E-07 | Chi 6.978    | AT4G28640 |
| my_prefix11818 | 999      | 7.24278E-07 | Chi 1.1088   | AT5G61090 |
| my_prefix6106  | 76.63039 | 7.70816E-07 | Chi 24.150   | AT1G13620 |
| my_prefix12698 | 789.1717 | 8.01765E-07 | Chi 5.826    | AT1G22130 |
| my_prefix15462 | 998.9999 | 9.64434E-07 | Chi 1.926    | AT5G59070 |
| my_prefix5523  | 91.03238 | 9.98975E-07 | Chi 2G31430  | AT2G31430 |
| my_prefix8421  | 212.7964 | 1.17994E-06 | Chi 2.891    | AT2G32640 |
| my_prefix11826 | 300.2767 | 1.21795E-06 | Chi 1.1113   | AT5G61380 |
| my_prefix6209  | 113.3037 | 1.33797E-06 | Chi 5.369    | AT1G17680 |
| my_prefix4966  | 25.43761 | 1.3645E-06  | Chi 8.408    | AT3G58290 |
| my_prefix8958  | 999      | 1.51105E-06 | Chi 113.69   | AT3G26050 |
| my_prefix14646 | 177.5176 | 1.57745E-06 | Chi 9.254    | AT5G15730 |
| my_prefix13755 | 999      | 1.65054E-06 | Chi 48.125   | AT3G20740 |
| my_prefix6399  | 999      | 1.74486E-06 | Chi 46.232   | AT1G27700 |
| my_prefix12465 | 305.1899 | 1.8164E-06  | Chi 13.387   | AT3G05450 |
| my_prefix6467  | 998.9993 | 1.98181E-06 | Chi 78.11    | AT1G30755 |
| my_prefix11719 | 998.9995 | 2.02169E-06 | Chi 1.768    | AT5G57670 |
| my_prefix12936 | 998.9997 | 2.12648E-06 | Chi 16.138   | AT1G06900 |
| my_prefix10856 | 999      | 2.13271E-06 | Chi 17.24    | AT4G25600 |
| my_prefix11769 | 214.5701 | 2.3558E-06  | Chi 1.927    | AT5G59050 |
| my_prefix9186  | 999      | 2.4318E-06  | Chi 31.211   | AT3G50920 |
| my_prefix9044  | 998.9821 | 2.45983E-06 | Chi 3G29385  | AT3G29385 |
| my_prefix12305 | 83.3862  | 2.45991E-06 | Chi 97.20    | AT3G43850 |
| my_prefix6454  | 125.3496 | 2.53228E-06 | Chi 78.79    | AT1G30130 |
| my_prefix4842  | 60.36018 | 2.69795E-06 | Chi 4.127    | AT2G36570 |
| my_prefix14221 | 50.48689 | 2.80045E-06 | Chi 113.65   | AT3G26010 |
| my_prefix9418  | 833.6189 | 2.81427E-06 | Chi 8.447    | AT3G58780 |

|                |          |             |              |           |
|----------------|----------|-------------|--------------|-----------|
| my_prefix12392 | 999      | 2.84777E-06 | Chi 66.13    | AT2G30933 |
| my_prefix12879 | 33.63933 | 2.93959E-06 | Chi 16.500   | AT1G03150 |
| my_prefix6005  | 998.9996 | 3.17543E-06 | Chi 77.47    | AT1G09830 |
| my_prefix12134 | 998.8046 | 3.27229E-06 | Chi 43.51    | AT4G14120 |
| my_prefix14585 | 24.74489 | 3.34273E-06 | Chi 3.231    | AT5G10950 |
| my_prefix13431 | 90.24286 | 3.36027E-06 | Chi 2.765    | AT1G73340 |
| my_prefix15327 | 866.3165 | 3.60245E-06 | Chi 45.21    | AT5G47840 |
| my_prefix4317  | 58.5822  | 3.66812E-06 | Chi 13.802   | AT3G01550 |
| my_prefix10619 | 466.3052 | 3.80896E-06 | Chi 6.462    | AT4G33800 |
| my_prefix13136 | 999      | 3.83881E-06 | Chi 55.29    | AT1G28200 |
| my_prefix7735  | 999      | 3.89863E-06 | Chi 7.417    | AT3G15630 |
| my_prefix9837  | 998.9972 | 4.27528E-06 | Chi 3.133    | AT5G12040 |
| my_prefix7766  | 999      | 4.62026E-06 | Chi 7.314    | AT3G16690 |
| my_prefix12919 | 204.0776 | 5.0445E-06  | Chi 16.206   | AT1G06070 |
| my_prefix5617  | 110.2945 | 5.06764E-06 | Chi 3.537    | AT5G07360 |
| my_prefix11780 | 388.3799 | 5.76479E-06 | Chi 1.957    | AT5G59570 |
| my_prefix8379  | 456.5172 | 5.76738E-06 | Chi 37.49    | AT2G30620 |
| my_prefix12112 | 999      | 5.78371E-06 | Chi 92.69    | AT4G18150 |
| my_prefix4681  | 58.90847 | 5.86907E-06 | Chi 2.213    | AT1G79070 |
| my_prefix7823  | 999      | 7.33914E-06 | Chi 7.130    | AT3G18610 |
| my_prefix11523 | 749.3293 | 7.52827E-06 | Chi 1.97     | AT5G50830 |
| my_prefix4755  | 75.28426 | 8.00582E-06 | Chi 7.50.1   | AT3G19260 |
| my_prefix4540  | 71.5994  | 8.8318E-06  | Chi 159.43   | AT1G29860 |
| my_prefix11269 | 80.17857 | 8.97409E-06 | Chi 111.1    | AT5G40020 |
| my_prefix13238 | 998.9999 | 1.0349E-05  | Chi 139.23   | AT1G50730 |
| my_prefix14074 | 69.91767 | 1.05017E-05 | Chi 4.516    | AT2G40240 |
| my_prefix8279  | 681.7103 | 1.10619E-05 | Chi 84.77    | AT2G26580 |
| my_prefix4543  | 998.9967 | 1.2069E-05  | Chi 78.20    | AT1G30670 |
| my_prefix12142 | 220.0772 | 1.20733E-05 | Chi 187.10   | AT5G37730 |
| my_prefix12267 | 571.6226 | 1.29335E-05 | Chi 99.13    | AT4G11340 |
| my_prefix14192 | 999      | 1.29725E-05 | Chi 70.52    | AT2G02140 |
| my_prefix10533 | 999      | 1.3028E-05  | Chi 6.153    | AT4G37170 |
| my_prefix12277 | 90.30626 | 1.32466E-05 | Chi 66.33    | AT4G03140 |
| my_prefix6652  | 998.9925 | 1.36709E-05 | Chi 139.48.2 | AT1G50440 |
| my_prefix11499 | 558.1408 | 1.41651E-05 | Chi 12.49    | AT5G49970 |
| my_prefix5364  | 82.30505 | 1.4281E-05  | Chi 5.916    | AT1G23420 |
| my_prefix14155 | 999      | 1.44135E-05 | Chi 4.1135   | AT2G46640 |
| my_prefix14050 | 998.9993 | 1.57884E-05 | Chi 4.281    | AT2G37960 |
| my_prefix8091  | 114.0414 | 1.60978E-05 | Chi 144.27   | AT2G17033 |
| my_prefix7181  | 999      | 1.63446E-05 | Chi 2.474    | AT1G76360 |

|                |          |             |               |           |
|----------------|----------|-------------|---------------|-----------|
| my_prefix10631 | 100.7907 | 1.77397E-05 | Chi 6.500     | AT4G33467 |
| my_prefix4976  | 67.37005 | 1.85065E-05 | Chi 22.104    | AT3G62990 |
| my_prefix10643 | 998.9658 | 1.99319E-05 | Chi 6.551     | AT4G32915 |
| my_prefix5094  | 998.9982 | 2.21043E-05 | Chi 6.117     | AT4G36600 |
| my_prefix12197 | 999      | 2.26094E-05 | Chi 3.147     | AT5G11870 |
| my_prefix15515 | 138.7241 | 2.27839E-05 | Chi 1.1305    | AT5G63380 |
| my_prefix12295 | 999      | 2.29165E-05 | Chi 41.94     | AT2G04025 |
| my_prefix7114  | 998.9998 | 2.31219E-05 | Chi 2.716     | AT1G73840 |
| my_prefix5127  | 70.52328 | 2.48663E-05 | Chi 4G28395D2 | AT4G28395 |
| my_prefix14857 | 290.1295 | 2.6163E-05  | Chi 15.154    | AT4G03510 |
| my_prefix9474  | 24.30771 | 2.85757E-05 | Chi 8.633     | AT3G61080 |
| my_prefix5862  | 63.81644 | 3.01568E-05 | Chi 16.375    | AT1G04530 |
| my_prefix15370 | 998.9996 | 3.0301E-05  | Chi 1.257     | AT5G52310 |
| my_prefix8406  | 999      | 3.03052E-05 | Chi 30.66     | AT2G31730 |
| my_prefix8234  | 432.7004 | 3.124E-05   | Chi 32.133    | AT2G24395 |
| my_prefix11934 | 998.9996 | 3.36234E-05 | Chi 1.1442    | AT5G64690 |
| my_prefix7440  | 29.20617 | 3.37238E-05 | Chi 13.407    | AT3G05260 |
| my_prefix5957  | 998.9998 | 3.38015E-05 | Chi 77.184    | AT1G08540 |
| my_prefix8685  | 82.27136 | 3.9024E-05  | Chi 4.646     | AT2G41550 |
| my_prefix14174 | 330.0121 | 3.97972E-05 | Chi 84.23     | AT2G47670 |
| my_prefix11416 | 999      | 4.30618E-05 | Chi 44.81     | AT5G43310 |
| my_prefix8269  | 140.7871 | 4.45762E-05 | Chi 17.420    | AT2G26240 |
| my_prefix5580  | 999      | 4.48958E-05 | Chi 31.272    | AT3G51540 |
| my_prefix12069 | 97.59169 | 4.5271E-05  | Chi 6.251     | AT4G35900 |
| my_prefix4795  | 73.05752 | 4.53729E-05 | Chi 13.5      | AT2G19010 |
| my_prefix8155  | 998.9992 | 4.58446E-05 | Chi 33.60     | AT2G20710 |
| my_prefix7900  | 394.0559 | 4.74141E-05 | Chi 68.119    | AT3G22200 |
| my_prefix7386  | 999      | 4.9516E-05  | Chi 13.575    | AT3G03610 |
| my_prefix11868 | 188.5749 | 4.95726E-05 | Chi 1.1249    | AT5G62720 |
| my_prefix13665 | 641.3279 | 5.04711E-05 | Chi 7.650     | AT3G13540 |
| my_prefix6266  | 313.4884 | 5.13568E-05 | Chi 5.623     | AT1G20450 |
| my_prefix15004 | 858.9091 | 5.1365E-05  | Chi 6.611     | AT4G32342 |
| my_prefix8447  | 999      | 5.19629E-05 | Chi 28.76     | AT2G33690 |
| my_prefix14219 | 129.7074 | 5.20547E-05 | Chi 113.58    | AT3G25950 |
| my_prefix4616  | 998.9999 | 5.2361E-05  | Chi 61.34.1   | AT1G61100 |
| my_prefix7079  | 998.9995 | 5.3198E-05  | Chi 2.852     | AT1G72490 |
| my_prefix6004  | 998.9983 | 5.39211E-05 | Chi 77.49     | AT1G09820 |
| my_prefix13394 | 998.9663 | 5.53719E-05 | Chi 25.137    | AT1G70210 |
| my_prefix5150  | 47.03799 | 5.60768E-05 | Chi 29.109    | AT4G22140 |
| my_prefix8633  | 288.7016 | 5.87355E-05 | Chi 4.478     | AT2G39910 |

|                |          |             |              |           |
|----------------|----------|-------------|--------------|-----------|
| my_prefix13427 | 47.62543 | 6.37285E-05 | Chi 1G72690  | AT1G72690 |
| my_prefix6188  | 998.9992 | 6.37517E-05 | Chi 5.293    | AT1G16900 |
| my_prefix8045  | 699.4892 | 6.4524E-05  | Chi 45.60    | AT2G15580 |
| my_prefix8574  | 60.15156 | 7.12858E-05 | Chi 4.289.1  | AT2G38025 |
| my_prefix12838 | 522.5459 | 7.45252E-05 | Chi 1.1297   | AT5G63270 |
| my_prefix5449  | 94.86623 | 7.84468E-05 | Chi 190.28   | AT1G80240 |
| my_prefix14103 | 156.0301 | 7.88499E-05 | Chi 4.707    | AT2G42200 |
| my_prefix11387 | 45.66227 | 8.1502E-05  | Chi 35.75    | AT5G44450 |
| my_prefix15339 | 18.89066 | 8.20307E-05 | Chi 104.19   | AT5G49150 |
| my_prefix5571  | 998.9998 | 8.34866E-05 | Chi 172.5    | AT3G47590 |
| my_prefix5412  | 67.65267 | 8.91951E-05 | Chi 29.54    | AT1G67260 |
| my_prefix5711  | 999      | 9.4112E-05  | Chi 50.216   | AT4G15810 |
| my_prefix11458 | 576.9053 | 9.54214E-05 | Chi 79.3     | AT5G48220 |
| my_prefix12754 | 58.6141  | 9.70648E-05 | Chi 1G53930  | AT1G53930 |
| my_prefix4889  | 998.9999 | 9.82714E-05 | Chi 22.11    | AT2G48080 |
| my_prefix10376 | 97.65838 | 0.000101008 | Chi 32.85    | AT4G02880 |
| my_prefix5842  | 95.60409 | 0.000101793 | Chi 16.449.1 | AT1G03780 |
| my_prefix5761  | 201.161  | 0.000109162 | Chi 1.1502   | AT5G65320 |
| my_prefix10415 | 24.62808 | 0.000117436 | Chi 24.195   | AT4G01650 |
| my_prefix7837  | 67.96291 | 0.000128695 | Chi 7.55     | AT3G19210 |
| my_prefix6251  | 998.9999 | 0.000129468 | Chi 5.567    | AT1G19790 |
| my_prefix9057  | 102.9464 | 0.000133245 | Chi 97.19    | AT3G43860 |
| my_prefix4701  | 999      | 0.000138591 | Chi 13.554   | AT3G03800 |
| my_prefix7097  | 122.0106 | 0.00014202  | Chi 2.778    | AT1G73180 |
| my_prefix14233 | 999      | 0.000150502 | Chi 112.46   | AT3G27410 |
| my_prefix15115 | 33.25592 | 0.000150723 | Chi 29.138   | AT4G21902 |
| my_prefix5815  | 998.9983 | 0.000155878 | Chi 16.555   | AT5G61710 |
| my_prefix5610  | 999      | 0.000156348 | Chi 3.994.1  | AT5G02520 |
| my_prefix7020  | 91.34044 | 0.000156928 | Chi 25.123   | AT1G70100 |
| my_prefix14237 | 11.01764 | 0.000161727 | Chi 15.59.1  | AT3G27730 |
| my_prefix5566  | 999      | 0.000164508 | Chi 215.4    | AT3G28960 |
| my_prefix5592  | 268.126  | 0.000165452 | Chi 8.236    | AT3G56550 |
| my_prefix4853  | 998.9997 | 0.000166806 | Chi 4.394    | AT2G39060 |
| my_prefix6225  | 26.0238  | 0.000176003 | Chi 5.473    | AT1G18750 |
| my_prefix5545  | 21.06962 | 0.000184822 | Chi 4.854    | AT2G43745 |
| my_prefix11634 | 89.558   | 0.000189743 | Chi 1.493    | AT5G54730 |
| my_prefix10905 | 25.80087 | 0.000193811 | Chi 17.161   | AT4G24270 |
| my_prefix9860  | 70.09114 | 0.000210389 | Chi 3.63     | AT5G13090 |
| my_prefix5745  | 80.6629  | 0.000245542 | Chi 1.847    | AT5G58450 |
| my_prefix7147  | 270.1612 | 0.000268083 | Chi 2.614.1  | AT1G74880 |

|                |          |             |              |           |
|----------------|----------|-------------|--------------|-----------|
| my_prefix10170 | 999      | 0.000269904 | Chi 26.108.1 | AT5G24165 |
| my_prefix7327  | 675.6113 | 0.000276479 | Chi 13.759   | AT3G01175 |
| my_prefix4690  | 999      | 0.000279929 | Chi 190.39   | AT1G80140 |
| my_prefix10163 | 52.65273 | 0.000294459 | Chi 26.78    | AT5G23910 |
| my_prefix10429 | 40.63975 | 0.000304304 | Chi 9.22     | AT4G01023 |
| my_prefix7242  | 368.5846 | 0.000306004 | Chi 2.243    | AT1G78810 |
| my_prefix9173  | 41.15435 | 0.000306887 | Chi 31.175   | AT3G50520 |
| my_prefix7605  | 998.9993 | 0.000311204 | Chi 7.853    | AT3G11405 |
| my_prefix8757  | 137.7538 | 0.000315949 | Chi 4.908    | AT2G44330 |
| my_prefix8073  | 998.9988 | 0.000318819 | Chi 27.59    | AT2G19450 |
| my_prefix11625 | 999      | 0.000331699 | Chi 1.465    | AT5G54470 |
| my_prefix12816 | 39.46566 | 0.000335766 | Chi 1.407    | AT5G53870 |
| my_prefix12738 | 42.60003 | 0.000341223 | Chi 13.23    | AT1G48170 |
| my_prefix12543 | 998.996  | 0.000362031 | Chi 11.231   | AT2G16440 |
| my_prefix10883 | 30.24497 | 0.000368029 | Chi 17.108   | AT4G24880 |
| my_prefix4539  | 998.9917 | 0.000386962 | Chi 1G29041  | AT1G29041 |
| my_prefix10657 | 999      | 0.000388253 | Chi 6.587    | AT4G32551 |
| my_prefix7032  | 18.00434 | 0.000394656 | Chi 25.192   | AT1G70650 |
| my_prefix6111  | 53.80938 | 0.000421027 | Chi 24.134   | AT1G13790 |
| my_prefix14394 | 999      | 0.000427826 | Chi 8.182    | AT3G55970 |
| my_prefix15086 | 999      | 0.000435044 | Chi 17.100   | AT4G24960 |
| my_prefix12151 | 425.0267 | 0.000446726 | Chi 111.40   | AT5G39820 |
| my_prefix10558 | 998.9997 | 0.000447124 | Chi 6.236    | AT4G36050 |
| my_prefix14392 | 35.91415 | 0.000447837 | Chi 8.180    | AT3G55950 |
| my_prefix12517 | 50.12879 | 0.000451414 | Chi 48.126   | AT3G20750 |
| my_prefix5999  | 998.9981 | 0.000456977 | Chi 77.62    | AT1G09750 |
| my_prefix10454 | 998.9998 | 0.000467784 | Chi 22.294.1 | AT4G38160 |
| my_prefix12238 | 87.1775  | 0.000471788 | Chi 9.839    | AT5G22650 |
| my_prefix11540 | 49.29172 | 0.000473387 | Chi 1.158    | AT5G51330 |
| my_prefix7351  | 688.443  | 0.000478814 | Chi 13.673   | AT3G02710 |
| my_prefix5320  | 19.78179 | 0.000490638 | Chi 16.195   | AT1G06170 |
| my_prefix5202  | 999      | 0.000507886 | Chi 49.30    | AT5G47680 |
| my_prefix7850  | 117.5766 | 0.000537943 | Chi 48.32.1  | AT3G19860 |
| my_prefix7038  | 123.2116 | 0.000600607 | Chi 25.214   | AT1G70900 |
| my_prefix8700  | 259.5516 | 0.000601344 | Chi 4.699    | AT2G42120 |
| my_prefix7659  | 999      | 0.000622657 | Chi 7.685    | AT3G13190 |
| my_prefix12508 | 999      | 0.000651103 | Chi 7.236    | AT3G17600 |
| my_prefix6820  | 726.8614 | 0.000664953 | Chi 38.103   | AT1G63460 |
| my_prefix4785  | 18.42758 | 0.000673904 | Chi 27.125   | AT2G20180 |
| my_prefix11145 | 999      | 0.000693317 | Chi 82.70    | AT4G15620 |

|                |          |             |            |           |
|----------------|----------|-------------|------------|-----------|
| my_prefix6967  | 190.0007 | 0.000716591 | Chi 2.1069 | AT1G68460 |
| my_prefix10348 | 325.0909 | 0.00071964  | Chi 103.60 | AT4G04920 |
| my_prefix8244  | 998.9955 | 0.000763319 | Chi 19.172 | AT2G24800 |
| my_prefix13805 | 817.7722 | 0.000783809 | Chi 21.22  | AT2G04620 |
| my_prefix8860  | 271.0489 | 0.000801068 | Chi 84.27  | AT2G47700 |
| my_prefix10408 | 60.77211 | 0.000805857 | Chi 24.176 | AT4G01870 |
| my_prefix14101 | 560.2535 | 0.000807102 | Chi 4.701  | AT2G42140 |
| my_prefix8233  | 58.48555 | 0.000835184 | Chi 32.127 | AT2G24350 |
| my_prefix13523 | 999      | 0.000860611 | Chi 13.766 | AT3G01230 |
| my_prefix4694  | 157.5723 | 0.000865465 | Chi 13.825 | AT3G01800 |
| my_prefix14492 | 75.81865 | 0.000893644 | Chi 3.1004 | AT5G02420 |
| my_prefix13386 | 999      | 0.000909935 | Chi 2.960  | AT1G69295 |
| my_prefix12355 | 46.33486 | 0.000927081 | Chi 40.92  | AT2G21195 |
| my_prefix9578  | 999      | 0.000931639 | Chi 3.992  | AT5G02540 |
| my_prefix5750  | 76.56984 | 0.000962124 | Chi 1.1090 | AT5G61110 |
| my_prefix5919  | 21.04126 | 0.000977835 | Chi 16.152 | AT1G06720 |
| my_prefix14431 | 53.99517 | 0.001003108 | Chi 8.545  | AT3G60110 |
| my_prefix4536  | 134.2839 | 0.00101137  | Chi 46.262 | AT1G28040 |
| my_prefix15382 | 999      | 0.00101637  | Chi 1.355  | AT5G53330 |
| my_prefix4527  | 73.89131 | 0.001049089 | Chi 46.16  | AT1G26790 |
| my_prefix9614  | 27.4188  | 0.001061558 | Chi 3.870  | AT5G03800 |
| my_prefix7939  | 108.6514 | 0.001069424 | Chi 156.11 | AT3G23740 |
| my_prefix9930  | 58.12079 | 0.001076022 | Chi 9.199  | AT5G15140 |
| my_prefix9748  | 118.5274 | 0.001077132 | Chi 3.446  | AT5G08340 |
| my_prefix12806 | 999      | 0.001081884 | Chi 1.200  | AT5G51790 |
| my_prefix7556  | 738.762  | 0.001158421 | Chi 56.128 | AT3G09580 |
| my_prefix5689  | 106.7894 | 0.00116163  | Chi 6.958  | AT4G28840 |
| my_prefix13509 | 998.9992 | 0.001201096 | Chi 2.80   | AT1G80310 |
| my_prefix5244  | 525.838  | 0.001204755 | Chi 1.441  | AT5G54225 |
| my_prefix12228 | 999      | 0.001224601 | Chi 9.560  | AT5G19030 |
| my_prefix4799  | 665.8389 | 0.001240523 | Chi 40.113 | AT2G21400 |
| my_prefix8343  | 999      | 0.0012413   | Chi 128.21 | AT2G28880 |
| my_prefix7002  | 32.18497 | 0.001241321 | Chi 2.949  | AT1G69400 |
| my_prefix7325  | 998.9963 | 0.001279753 | Chi 13.763 | AT3G01200 |
| my_prefix5766  | 278.61   | 0.001321624 | Chi 1.1593 | AT5G67340 |
| my_prefix5740  | 13.07457 | 0.001361824 | Chi 1.594  | AT5G55690 |
| my_prefix4706  | 998.9998 | 0.001411028 | Chi 13.382 | AT3G05510 |
| my_prefix8369  | 998.9981 | 0.001461484 | Chi 96.60  | AT2G30340 |
| my_prefix11639 | 999      | 0.001468021 | Chi 1.519  | AT5G54920 |
| my_prefix7716  | 998.9993 | 0.001468572 | Chi 7.468  | AT3G15260 |

|                |          |             |             |           |
|----------------|----------|-------------|-------------|-----------|
| my_prefix11569 | 998.9989 | 0.001499717 | Chi 1.261   | AT5G52380 |
| my_prefix11262 | 36.64303 | 0.00155663  | Chi 24.275  | AT5G40470 |
| my_prefix10869 | 998.9942 | 0.001628513 | Chi 17.75   | AT4G25190 |
| my_prefix8991  | 23.73896 | 0.001675189 | Chi 21.157  | AT3G26940 |
| my_prefix12118 | 306.739  | 0.001689673 | Chi 50.102  | AT4G16695 |
| my_prefix10916 | 157.8309 | 0.001690943 | Chi 17.198  | AT4G23940 |
| my_prefix4537  | 999      | 0.001711346 | Chi 46.266  | AT1G28080 |
| my_prefix9615  | 615.5523 | 0.001759102 | Chi 3.867   | AT5G03840 |
| my_prefix8742  | 83.71412 | 0.001764001 | Chi 4.848   | AT2G43670 |
| my_prefix6994  | 999      | 0.001765875 | Chi 2.974   | AT1G69180 |
| my_prefix9827  | 999      | 0.001850534 | Chi 3.153   | AT5G11810 |
| my_prefix12248 | 107.7819 | 0.001929865 | Chi 145.11  | AT5G25890 |
| my_prefix12655 | 185.2164 | 0.001932687 | Chi 77.92   | AT1G09460 |
| my_prefix4804  | 999      | 0.001935422 | Chi 85.48   | AT2G23530 |
| my_prefix10853 | 998.9992 | 0.001947324 | Chi 17.21   | AT4G25630 |
| my_prefix4673  | 998.9965 | 0.002036681 | Chi 2.416   | AT1G76952 |
| my_prefix8638  | 999      | 0.002347761 | Chi 4.485   | AT2G39970 |
| my_prefix13457 | 998.9996 | 0.002354483 | Chi 2.559.2 | AT1G75400 |
| my_prefix10044 | 32.60263 | 0.002386377 | Chi 9.567   | AT5G19100 |
| my_prefix7050  | 998.9992 | 0.002422551 | Chi 25.238  | AT1G71160 |
| my_prefix12821 | 90.34266 | 0.002469867 | Chi 1.652   | AT5G56369 |
| my_prefix11892 | 475.6043 | 0.002494046 | Chi 1.1303  | AT5G63350 |
| my_prefix5829  | 998.9999 | 0.002625594 | Chi 16.510  | AT1G03055 |
| my_prefix6363  | 999      | 0.002678054 | Chi 46.40   | AT1G26580 |
| my_prefix12742 | 57.34158 | 0.002695838 | Chi 67.103  | AT1G49420 |
| my_prefix12390 | 998.9999 | 0.00279398  | Chi 18.114  | AT2G30280 |
| my_prefix6674  | 17.17488 | 0.002822458 | Chi 83.74   | AT1G52050 |
| my_prefix6374  | 56.78627 | 0.002824791 | Chi 46.105  | AT1G25440 |
| my_prefix12293 | 12.03367 | 0.002878434 | Chi 41.14   | AT2G03060 |
| my_prefix5774  | 81.21372 | 0.002922637 | Chi 140.14  | AT4G12840 |
| my_prefix11853 | 48.47368 | 0.00292934  | Chi 1.1200  | AT5G62240 |
| my_prefix11929 | 245.9141 | 0.003033758 | Chi 1.1434  | AT5G64630 |
| my_prefix11051 | 999      | 0.003048039 | Chi 92.1    | AT4G18600 |
| my_prefix11664 | 999      | 0.00308861  | Chi 1.593   | AT5G55670 |
| my_prefix6606  | 17.3855  | 0.003123516 | Chi 89.6    | AT1G48330 |
| my_prefix5717  | 21.99707 | 0.003172492 | Chi 30.19   | AT4G13630 |
| my_prefix13950 | 37.31183 | 0.003212734 | Chi 22.250  | AT2G28600 |
| my_prefix9182  | 908.4888 | 0.003330223 | Chi 31.204  | AT3G50850 |
| my_prefix14267 | 291.6385 | 0.003334939 | Chi 98.36   | AT3G45275 |
| my_prefix9899  | 999      | 0.003430347 | Chi 9.103   | AT5G14070 |



|                |          |             |             |           |
|----------------|----------|-------------|-------------|-----------|
| my_prefix11806 | 999      | 0.003442343 | Chi 1.1046  | AT5G60650 |
| my_prefix13009 | 202.1174 | 0.003541797 | Chi 5.73    | AT1G14540 |
| my_prefix12444 | 15.14492 | 0.003562966 | Chi 4.1019  | AT2G45500 |
| my_prefix10444 | 748.0653 | 0.003694153 | Chi 2.60    | AT4G00200 |
| my_prefix6320  | 66.93992 | 0.00370801  | Chi 5.876   | AT1G23050 |
| my_prefix11023 | 998.9996 | 0.003744628 | Chi 17.412  | AT4G19590 |
| my_prefix15372 | 998.9997 | 0.003795121 | Chi 1.267   | AT5G52440 |
| my_prefix12034 | 20.21999 | 0.003870251 | Chi 142.17  | AT4G12970 |
| my_prefix11321 | 27.9224  | 0.003877623 | Chi 15.107  | AT5G47220 |
| my_prefix4997  | 998.9897 | 0.003922273 | Chi 5G05365 | AT5G05365 |
| my_prefix14500 | 998.9999 | 0.004008745 | Chi 3.905   | AT5G03510 |
| my_prefix14612 | 58.40446 | 0.004042662 | Chi 3.73    | AT5G12980 |
| my_prefix14961 | 9.78871  | 0.004057262 | Chi 6.329   | AT4G35130 |
| my_prefix11173 | 998.9999 | 0.004119395 | Chi 43.88   | AT4G14330 |
| my_prefix8178  | 334.257  | 0.0041604   | Chi 93.46   | AT2G21690 |
| my_prefix12454 | 749.6593 | 0.004178934 | Chi 13.723  | AT3G02260 |
| my_prefix8532  | 12.19401 | 0.004199138 | Chi 4.133   | AT2G36640 |
| my_prefix11750 | 998.9998 | 0.004356053 | Chi 1.854   | AT5G58530 |
| my_prefix5593  | 9.18249  | 0.004410907 | Chi 8.314   | AT3G57240 |
| my_prefix9080  | 25.92553 | 0.004475049 | Chi 53.57   | AT3G45830 |
| my_prefix9688  | 998.9997 | 0.004527465 | Chi 3.644   | AT5G06250 |
| my_prefix5310  | 239.0403 | 0.004528009 | Chi 8.778   | AT1G02040 |
| my_prefix13943 | 998.9999 | 0.004602903 | Chi 18.50   | AT2G28190 |
| my_prefix6049  | 999      | 0.004638993 | Chi 10.178  | AT1G11710 |
| my_prefix13013 | 48.52214 | 0.004666663 | Chi 5.85    | AT1G14680 |
| my_prefix12653 | 921.7209 | 0.004674729 | Chi 77.210  | AT1G08310 |
| my_prefix14134 | 40.35453 | 0.00472843  | Chi 4.978   | AT2G45050 |
| my_prefix13000 | 30.24992 | 0.00474554  | Chi 24.135  | AT1G13770 |
| my_prefix8341  | 246.8276 | 0.005160195 | Chi 128.12  | AT2G28810 |
| my_prefix7109  | 218.8859 | 0.005175041 | Chi 1G73640 | AT1G73640 |
| my_prefix5530  | 188.5859 | 0.005312021 | Chi 4.28    | AT2G35640 |
| my_prefix13978 | 999      | 0.005317319 | Chi 63.111  | AT2G32020 |
| my_prefix6405  | 998.9983 | 0.00534541  | Chi 46.254  | AT1G27960 |
| my_prefix6213  | 66.26749 | 0.005405377 | Chi 5.422   | AT1G18265 |
| my_prefix7350  | 93.90512 | 0.005628248 | Chi 13.674  | AT3G02700 |
| my_prefix14120 | 32.72467 | 0.005676639 | Chi 4.846   | AT2G43650 |
| my_prefix12708 | 15.25104 | 0.005714091 | Chi 46.58   | AT1G26330 |
| my_prefix5924  | 998.9969 | 0.005746145 | Chi 16.132  | AT1G06930 |
| my_prefix14197 | 87.80688 | 0.00574945  | Chi 70.14   | AT2G02750 |
| my_prefix11427 | 6.94369  | 0.005784427 | Chi 75.60   | AT5G42810 |

|                |          |             |             |           |
|----------------|----------|-------------|-------------|-----------|
| my_prefix13420 | 998.9999 | 0.005808203 | Chi 25.335  | AT1G72220 |
| my_prefix9665  | 124.733  | 0.005874343 | Chi 3.716   | AT5G05500 |
| my_prefix9514  | 27.09612 | 0.005965836 | Chi 22.73   | AT3G62670 |
| my_prefix12190 | 999      | 0.005974583 | Chi 3.336   | AT5G09850 |
| my_prefix13470 | 998.9963 | 0.006005702 | Chi 2.435   | AT1G76740 |
| my_prefix8848  | 145.5055 | 0.006083866 | Chi 4.1200  | AT2G47310 |
| my_prefix14057 | 13.28329 | 0.006114031 | Chi 4.332   | AT2G38440 |
| my_prefix11670 | 9.22851  | 0.006177529 | Chi 1.608   | AT5G55860 |
| my_prefix6090  | 14.31292 | 0.006194014 | Chi 195.32  | AT1G13030 |
| my_prefix10458 | 171.6672 | 0.006218553 | Chi 22.317  | AT4G38410 |
| my_prefix14164 | 998.9996 | 0.006243921 | Chi 4.1166  | AT2G46970 |
| my_prefix10079 | 38.3723  | 0.006324211 | Chi 9.668   | AT5G20110 |
| my_prefix5650  | 37.22081 | 0.006348835 | Chi 34.35   | AT5G26690 |
| my_prefix8827  | 20.75572 | 0.006409    | Chi 4.1104  | AT2G46360 |
| my_prefix8345  | 22.69874 | 0.006417434 | Chi 128.24  | AT2G28910 |
| my_prefix7419  | 502.0434 | 0.006482623 | Chi 13.473  | AT3G04700 |
| my_prefix12254 | 998.9979 | 0.006568196 | Chi 18.141  | AT5G27220 |
| my_prefix15499 | 999      | 0.006907614 | Chi 1.1188  | AT5G62130 |
| my_prefix4870  | 27.84611 | 0.006992284 | Chi 4.766   | AT2G42830 |
| my_prefix8697  | 999      | 0.007089553 | Chi 4.695   | AT2G42070 |
| my_prefix8898  | 178.4879 | 0.007326026 | Chi 70.99   | AT2G01770 |
| my_prefix13727 | 31.19663 | 0.007380647 | Chi 7.154   | AT3G18370 |
| my_prefix7705  | 998.9995 | 0.007459208 | Chi 7.494   | AT3G15000 |
| my_prefix7687  | 998.9998 | 0.007464917 | Chi 7.575   | AT3G14170 |
| my_prefix13257 | 12.68886 | 0.007482742 | Chi 83.39   | AT1G52380 |
| my_prefix10726 | 275.883  | 0.007552905 | Chi 6.847   | AT4G29930 |
| my_prefix14996 | 94.58159 | 0.007854513 | Chi 6.561   | AT4G32820 |
| my_prefix7316  | 51.24457 | 0.008002566 | Chi 13.799  | AT3G01516 |
| my_prefix15392 | 88.89382 | 0.008014491 | Chi 1.466   | AT5G54480 |
| my_prefix12130 | 33.34813 | 0.0080221   | Chi 42.29   | AT4G14815 |
| my_prefix8940  | 999      | 0.00811397  | Chi 41.84   | AT2G03830 |
| my_prefix13893 | 999      | 0.008157594 | Chi 21.99   | AT2G22260 |
| my_prefix6556  | 15.21695 | 0.008159022 | Chi 39.57   | AT1G36390 |
| my_prefix5770  | 998.9993 | 0.008207524 | Chi 152.4   | AT4G13440 |
| my_prefix12404 | 883.8172 | 0.008333765 | Chi 12.301  | AT2G33880 |
| my_prefix12623 | 137.8095 | 0.008344539 | Chi 84.40.3 | AT1G01760 |
| my_prefix8812  | 20.72617 | 0.008478964 | Chi 4.1073  | AT2G46020 |
| my_prefix10045 | 23.33591 | 0.008485478 | Chi 9.570   | AT5G19120 |
| my_prefix8021  | 73.65928 | 0.008529343 | Chi 75.71   | AT2G13350 |
| my_prefix9401  | 12.73507 | 0.008635437 | Chi 8.395   | AT3G58130 |

|                |          |             |            |           |
|----------------|----------|-------------|------------|-----------|
| my_prefix15514 | 38.77324 | 0.008648097 | Chi 1.1288 | AT5G63140 |
| my_prefix14224 | 20.94047 | 0.008649515 | Chi 21.215 | AT3G26390 |
| my_prefix10708 | 766.2287 | 0.008683115 | Chi 117.36 | AT4G30820 |
| my_prefix5640  | 998.9999 | 0.008690481 | Chi 9.789  | AT5G22090 |
| my_prefix10460 | 998.9999 | 0.00914436  | Chi 22.325 | AT4G38500 |
| my_prefix15533 | 999      | 0.009150489 | Chi 1.1474 | AT5G64970 |
| my_prefix8136  | 365.7003 | 0.00941695  | Chi 42.143 | AT2G18650 |
| my_prefix8558  | 256.3622 | 0.009417393 | Chi 4.201  | AT2G37270 |
| my_prefix5337  | 999      | 0.009440767 | Chi 10.158 | AT1G11905 |
| my_prefix4457  | 62.29567 | 0.009724965 | Chi 16.192 | AT1G06210 |
| my_prefix13356 | 999      | 0.009860859 | Chi 45.128 | AT1G66670 |
| my_prefix10705 | 49.20184 | 0.009930246 | Chi 6.746  | AT4G30880 |

---

**Table S15. KEGG functional categories of PSGs in *C. himalaica*.**

| KEGG terms                                            | Input number | <i>P</i> value |
|-------------------------------------------------------|--------------|----------------|
| Zeatin biosynthesis                                   | 3            | 0.01831        |
| Sulfur relay system (Ubiquitin related)               | 2            | 0.04626        |
| Peroxisome                                            | 5            | 0.05029        |
| Folate biosynthesis                                   | 2            | 0.09506        |
| Alanine, aspartate and glutamate metabolism           | 3            | 0.09905        |
| Riboflavin metabolism                                 | 1            | 0.19725        |
| Nucleotide excision repair                            | 3            | 0.2061         |
| Mismatch repair                                       | 2            | 0.22368        |
| Base excision repair                                  | 2            | 0.25595        |
| Aminoacyl-tRNA biosynthesis                           | 4            | 0.25968        |
| Spliceosome                                           | 6            | 0.26199        |
| Plant hormone signal transduction                     | 8            | 0.26251        |
| Vitamin B6 metabolism                                 | 1            | 0.28079        |
| DNA replication                                       | 2            | 0.31244        |
| Arachidonic acid metabolism                           | 1            | 0.32669        |
| Arginine and proline metabolism                       | 2            | 0.33641        |
| Glutathione metabolism                                | 3            | 0.34684        |
| Basal transcription factors                           | 2            | 0.35226        |
| Homologous recombination                              | 2            | 0.36013        |
| Phenylalanine, tyrosine and tryptophan biosynthesis   | 2            | 0.36797        |
| Flavonoid biosynthesis                                | 1            | 0.38336        |
| Lysine degradation                                    | 1            | 0.44756        |
| Inositol phosphate metabolism                         | 2            | 0.45128        |
| mRNA surveillance pathway                             | 3            | 0.46876        |
| Purine metabolism                                     | 4            | 0.46921        |
| Carotenoid biosynthesis                               | 1            | 0.48283        |
| Propanoate metabolism                                 | 1            | 0.52638        |
| Ubiquinone biosynthesis                               | 1            | 0.54676        |
| Fatty acid elongation                                 | 1            | 0.54676        |
| Circadian rhythm - plant                              | 1            | 0.55662        |
| Glycerophospholipid metabolism                        | 2            | 0.57291        |
| beta-Alanine metabolism                               | 1            | 0.59397        |
| Phenylalanine metabolism                              | 1            | 0.61145        |
| N-Glycan biosynthesis                                 | 1            | 0.62818        |
| Stilbenoid, diarylheptanoid and gingerol biosynthesis | 1            | 0.64418        |
| protein ubiquitination                                | 10           | 0.65115        |
| Porphyrin and chlorophyll metabolism                  | 1            | 0.65951        |
| Phenylpropanoid biosynthesis                          | 3            | 0.6786         |
| Glycerolipid metabolism                               | 1            | 0.69499        |
| Galactose metabolism                                  | 1            | 0.70812        |
| RNA transport                                         | 3            | 0.72487        |
| Terpenoid backbone biosynthesis                       | 1            | 0.72677        |
| Glycolysis / Gluconeogenesis                          | 2            | 0.73387        |

|                                             |    |         |
|---------------------------------------------|----|---------|
| Fructose and mannose metabolism             | 1  | 0.76059 |
| Phosphatidylinositol signaling system       | 1  | 0.78077 |
| Glycine, serine and threonine metabolism    | 1  | 0.79926 |
| Endocytosis                                 | 2  | 0.82322 |
| Protein processing in endoplasmic reticulum | 3  | 0.84884 |
| Phagosome                                   | 1  | 0.85254 |
| Plant-pathogen interaction                  | 2  | 0.88468 |
| RNA degradation                             | 1  | 0.91687 |
| Biosynthesis of amino acids                 | 3  | 0.92117 |
| Pyrimidine metabolism                       | 1  | 0.92389 |
| Starch and sucrose metabolism               | 2  | 0.93805 |
| Ubiquitin mediated proteolysis              | 1  | 0.95712 |
| Biosynthesis of secondary metabolites       | 15 | 0.98026 |
| Ribosome                                    | 1  | 0.99968 |

---

**Table S16. GO categories of PSGs in *C. himalaica*.**

| GO terms   | Function                                                                            | # input list | # in background | P value  | FDR      |
|------------|-------------------------------------------------------------------------------------|--------------|-----------------|----------|----------|
| GO:0048608 | Reproductive structure development                                                  | 79           | 1722            | 4.50E-10 | 2.00E-06 |
| GO:0022414 | Reproductive process                                                                | 91           | 2224            | 4.60E-09 | 5.10E-06 |
| GO:0003006 | Reproductive developmental process                                                  | 86           | 2050            | 4.40E-09 | 5.10E-06 |
| GO:0009791 | Post-embryonic development                                                          | 90           | 2188            | 4.50E-09 | 5.10E-06 |
| GO:0000003 | Reproduction                                                                        | 92           | 2272            | 6.10E-09 | 5.40E-06 |
| GO:0007275 | Multicellular organismal development                                                | 135          | 3864            | 9.50E-09 | 6.90E-06 |
| GO:0032501 | Multicellular organismal process                                                    | 136          | 4020            | 5.50E-08 | 3.50E-05 |
| GO:0016070 | RNA metabolic process                                                               | 128          | 3734            | 7.50E-08 | 4.10E-05 |
| GO:0009908 | Flower development                                                                  | 48           | 948             | 1.00E-07 | 4.90E-05 |
| GO:0032502 | Developmental process                                                               | 136          | 4094            | 1.60E-07 | 6.90E-05 |
| GO:0048437 | Floral organ development                                                            | 34           | 605             | 8.80E-07 | 0.00035  |
| GO:0048569 | Post-embryonic organ development                                                    | 34           | 608             | 9.80E-07 | 0.00036  |
| GO:0048438 | Floral whorl development                                                            | 30           | 510             | 1.60E-06 | 0.00055  |
| GO:0048856 | Anatomical structure development                                                    | 113          | 3396            | 2.20E-06 | 0.00064  |
| GO:0048646 | Anatomical structure formation involved in morphogenesis                            | 23           | 331             | 2.10E-06 | 0.00064  |
| GO:0010468 | Regulation of gene expression                                                       | 94           | 2695            | 2.90E-06 | 0.00081  |
| GO:0019219 | Regulation of nucleobase, nucleoside, nucleotide and nucleic acid metabolic process | 88           | 2496            | 4.30E-06 | 0.00095  |
| GO:0006139 | Nucleobase, nucleoside, nucleotide and nucleic acid metabolic process               | 147          | 4798            | 4.30E-06 | 0.00095  |
| GO:0010556 | Regulation of macromolecule biosynthetic process                                    | 88           | 2491            | 3.90E-06 | 0.00095  |
| GO:0060255 | Regulation of macromolecule metabolic process                                       | 97           | 2829            | 4.00E-06 | 0.00095  |
| GO:0009889 | Regulation of biosynthetic process                                                  | 91           | 2634            | 6.30E-06 | 0.0011   |
| GO:0006355 | Regulation of transcription, DNA-dependent                                          | 84           | 2372            | 6.20E-06 | 0.0011   |
| GO:0051171 | Regulation of nitrogen compound metabolic process                                   | 88           | 2517            | 5.80E-06 | 0.0011   |
| GO:0031326 | Regulation of cellular biosynthetic process                                         | 91           | 2631            | 6.00E-06 | 0.0011   |
| GO:0045449 | Regulation of transcription                                                         | 84           | 2376            | 6.60E-06 | 0.0012   |
| GO:0051252 | Regulation of RNA metabolic process                                                 | 84           | 2388            | 7.90E-06 | 0.0013   |
| GO:0048645 | Organ formation                                                                     | 16           | 192             | 9.30E-06 | 0.0015   |
| GO:0048449 | Floral organ formation                                                              | 15           | 174             | 1.20E-05 | 0.0019   |
| GO:0080090 | Regulation of primary metabolic process                                             | 93           | 2761            | 1.30E-05 | 0.002    |
| GO:0006350 | Transcription                                                                       | 89           | 2620            | 1.50E-05 | 0.0021   |
| GO:0006351 | Transcription, DNA-dependent                                                        | 89           | 2618            | 1.50E-05 | 0.0021   |
| GO:0032774 | RNA biosynthetic process                                                            | 89           | 2621            | 1.50E-05 | 0.0021   |
| GO:0019222 | Regulation of metabolic process                                                     | 103          | 3186            | 2.20E-05 | 0.0029   |
| GO:0048563 | Post-embryonic organ morphogenesis                                                  | 17           | 233             | 2.50E-05 | 0.0031   |
| GO:0048444 | Floral organ morphogenesis                                                          | 17           | 233             | 2.50E-05 | 0.0031   |
| GO:0031323 | Regulation of cellular metabolic process                                            | 96           | 2928            | 2.60E-05 | 0.0032   |
| GO:0006807 | Nitrogen compound metabolic process                                                 | 164          | 5675            | 2.70E-05 | 0.0032   |
| GO:0048481 | Ovule development                                                                   | 13           | 159             | 7.50E-05 | 0.0087   |
| GO:0048465 | Corolla development                                                                 | 11           | 117             | 8.50E-05 | 0.0091   |
| GO:0048440 | Carpel development                                                                  | 17           | 258             | 8.10E-05 | 0.0091   |

|            |                                                                                      |    |      |          |        |
|------------|--------------------------------------------------------------------------------------|----|------|----------|--------|
| GO:0048441 | Petal development                                                                    | 11 | 117  | 8.50E-05 | 0.0091 |
| GO:0000398 | Nuclear mRNA splicing, via spliceosome                                               | 11 | 120  | 0.0001   | 0.011  |
| GO:0048467 | Gynoecium development                                                                | 17 | 268  | 0.00012  | 0.013  |
| GO:0048518 | Positive regulation of biological process                                            | 37 | 896  | 0.00019  | 0.019  |
| GO:0006396 | RNA processing                                                                       | 39 | 967  | 0.0002   | 0.02   |
| GO:0000375 | RNA splicing, via transesterification reactions                                      | 11 | 131  | 0.00021  | 0.02   |
| GO:0000377 | RNA splicing, via transesterification reactions with bulged adenosine as nucleophile | 11 | 131  | 0.00021  | 0.02   |
| GO:0006397 | mRNA processing                                                                      | 13 | 179  | 0.00023  | 0.021  |
| GO:0048580 | Regulation of post-embryonic development                                             | 23 | 459  | 0.00026  | 0.023  |
| GO:0008284 | Positive regulation of cell proliferation                                            | 8  | 72   | 0.00028  | 0.024  |
| GO:0048731 | System development                                                                   | 69 | 2083 | 0.0003   | 0.026  |
| GO:0048513 | Organ development                                                                    | 69 | 2083 | 0.0003   | 0.026  |
| GO:0016071 | mRNA metabolic process                                                               | 20 | 381  | 0.00036  | 0.03   |
| GO:0048522 | Positive regulation of cellular process                                              | 33 | 793  | 0.00036  | 0.03   |
| GO:0009886 | Post-embryonic morphogenesis                                                         | 24 | 503  | 0.00037  | 0.03   |
| GO:0042440 | Pigment metabolic process                                                            | 19 | 361  | 0.00049  | 0.038  |
| GO:0007131 | Reciprocal meiotic recombination                                                     | 11 | 145  | 0.00048  | 0.038  |

---
